# Supplementary material for: Insights into electrosensory organ development, physiology and evolution from a lateral line-enriched transcriptome
Source: eLife. 2017 Mar 27;6:e24197. doi: 10.7554/eLife.24197 (PMC5429088; doi:10.7554/eLife.24197)
Supplement: Supplementary file 1. — DOI: http://dx.doi.org/10.7554/eLife.24197.008 [file elife-24197-supp1.xlsx]

## Sheet: Modrell Suppl File1
UniprotID	Gene name	Description	id	log2Fold Change	Fold change	padj	Pfam	Gene Ontology
F8W5R9	Aatka	apoptosis associated tyrosine kinase	Locus_41338	1.90685	3.74989	0.000560697	PF07714:Pkinase_Tyr	GO:0005524:F:ATP binding; GO:0004713:F:protein tyrosine kinase activity
H0Z5M3	ABTB2	ankyrin repeat and BTB domain containing 2	Locus_20809	0.979355	1.97158	0.0722573	PF00023:Ank; PF12796:Ank_2; PF00651:BTB	GO:0097237:P:cellular response to toxic substance; GO:0005654:C:nucleoplasm
F7AKU7	ACSBG1	acyl-CoA synthetase bubblegum family member 1	Locus_53150	1.96879	3.9144	0.000312904	PF00501:AMP-binding	GO:0003824:F:catalytic activity
I3JXZ9	adamts13	ADAM metallopeptidase with thrombospondin type 1 motif 13	Locus_11940	2.23225	4.69867	3.41105e-10	PF05986:ADAM_spacer1; PF01421:Reprolysin; PF00090:TSP_1	GO:0005578:C:proteinaceous extracellular matrix; GO:0004222:F:metalloendopeptidase activity; GO:0008270:F:zinc ion binding; GO:0006508:P:proteolysis
H0WH22	ADD2	adducin 2	Locus_56493	1.69808	3.24468	0.0754985	PF00596:Aldolase_II	GO:0046872:F:metal ion binding
F7EHQ0	ADGRD2	adhesion G protein-coupled receptor D2	Locus_10363	1.359	2.56507	0.0107539	PF00002:7tm_2; PF01825:GPS; PF00354:Pentaxin	GO:0016021:C:integral to membrane; GO:0005886:C:plasma membrane; GO:0004930:F:G-protein coupled receptor activity; GO:0007218:P:neuropeptide signaling pathway
E1BT77	ADPRHL1	ADP-ribosylhydrolase like 1	Locus_145465	1.52972	2.8873	0.00481323	PF03747:ADP_ribosyl_GH	GO:0003875:F:ADP-ribosylarginine hydrolase activity; GO:0000287:F:magnesium ion binding; GO:0051725:P:protein de-ADP-ribosylation
Q8JG69	adra2db	adrenergic, alpha-2D-, receptor b	Locus_22479	1.26261	2.39929	0.0600823	PF00001:7tm_1	GO:0005887:C:integral to plasma membrane; GO:0004938:F:alpha2-adrenergic receptor activity; GO:0007194:P:negative regulation of adenylate cyclase activity
I3KG27	agr2	anterior gradient 2, protein disulphide isomerase family member	Locus_40275	2.11776	4.3402	0.0779878	NO PFAM	GO:0060575:P:intestinal epithelial cell differentiation
H0YWI1	AGR3	anterior gradient 3, protein disulphide isomerase family member	Locus_69854	3.32986	10.0551	7.84493e-11	NO PFAM	NO Gene Ontology
F6Z1X2	AKNA	AT-hook transcription factor	Locus_17322	1.10075	2.14466	0.0188152	PF12443:AKNA	GO:0000978:F:RNA polymerase II core promoter proximal region sequence-specific DNA binding; GO:0001077:F:transcriptional activator activity, RNA polymerase II core promoter proximal region sequence-specific binding; GO:0016020:C:membrane
H0WT05	ALDH1A3	aldehyde dehydrogenase 1 family member A3	Locus_22458	2.44793	5.45634	2.32557e-09	PF00171:Aldedh	GO:0016620:F:oxidoreductase activity, acting on the aldehyde or oxo group of donors, NAD or NADP as acceptor
Q7TQF7	Amph	amphiphysin	Locus_21800	2.0132	4.03676	2.91231e-06	PF03114:BAR; PF07653:SH3_2	GO:0030054:C:cell junction; GO:0005856:C:cytoskeleton; GO:0008021:C:synaptic vesicle; GO:0030672:C:synaptic vesicle membrane; GO:0007612:P:learning; GO:0048488:P:synaptic vesicle endocytosis
G3SZM6	ANGPT1	angiopoietin 1	Locus_27504	1.23106	2.34739	0.00797525	PF00147:Fibrinogen_C	GO:0045121:C:membrane raft; GO:0005902:C:microvillus; GO:0005886:C:plasma membrane; GO:0007171:P:activation of transmembrane receptor protein tyrosine kinase activity; GO:0031589:P:cell-substrate adhesion; GO:0072012:P:glomerulus vasculature development; GO:0030097:P:hemopoiesis; GO:0030210:P:heparin biosynthetic process; GO:0001701:P:in utero embryonic development; GO:0007162:P:negative regulati…
H3APK8	ANXA9	annexin A9	Locus_71455	2.44077	5.42933	2.88376e-08	PF00191:Annexin	GO:0005509:F:calcium ion binding; GO:0005544:F:calcium-dependent phospholipid binding; GO:0004859:F:phospholipase inhibitor activity
H2UTI0	AP3B2	adaptor related protein complex 3 beta 2 subunit	Locus_2980	2.81246	7.02482	5.57139e-11	PF01602:Adaptin_N	GO:0030123:C:AP-3 adaptor complex; GO:0006886:P:intracellular protein transport; GO:0016192:P:vesicle-mediated transport
G3T6C4	APCDD1	APC down-regulated 1	Locus_10178	1.1569	2.22977	0.0183424	NO PFAM	GO:0005887:C:integral to plasma membrane; GO:0001942:P:hair follicle development; GO:0030178:P:negative regulation of Wnt receptor signaling pathway
F1NT43	ARHGEF1	Rho guanine nucleotide exchange factor (GEF) 1	Locus_11188	2.01932	4.05393	0.0201922	PF00621:RhoGEF	GO:0005622:C:intracellular; GO:0005543:F:phospholipid binding; GO:0005089:F:Rho guanyl-nucleotide exchange factor activity; GO:0035023:P:regulation of Rho protein signal transduction
F7F3Z6	ARHGEF38	Rho guanine nucleotide exchange factor 38	Locus_20156	1.67118	3.18475	2.75972e-05	PF03114:BAR; PF00621:RhoGEF; PF00018:SH3_1	GO:0005737:C:cytoplasm; GO:0005089:F:Rho guanyl-nucleotide exchange factor activity; GO:0035556:P:intracellular signal transduction; GO:0035023:P:regulation of Rho protein signal transduction
F1QKW5	arl13a	ADP ribosylation factor like GTPase 13A	Locus_74606	4.56945	23.7433	6.42924e-10	PF00025:Arf	GO:0005622:C:intracellular; GO:0005525:F:GTP binding; GO:0007264:P:small GTPase mediated signal transduction
H3A972	ATOH1	atonal bHLH transcription factor 1	Locus_72274	4.21689	18.5956	1.98155e-23	PF00010:HLH	GO:0003682:F:chromatin binding; GO:0043565:F:sequence-specific DNA binding; GO:0042668:P:auditory receptor cell fate determination; GO:0060119:P:inner ear receptor cell development; GO:0035675:P:neuromast hair cell development; GO:0048923:P:posterior lateral line neuromast hair cell differentiation; GO:0006355:P:regulation of transcription, DNA-templated
F1PRT7	ATP13A4	ATPase 13A4	Locus_32978	2.25196	4.76331	5.57165e-08	PF00690:Cation_ATPase_N; PF00122:E1-E2_ATPase; PF12409:P5-ATPase	GO:0016021:C:integral to membrane; GO:0005524:F:ATP binding; GO:0019829:F:cation-transporting ATPase activity; GO:0046872:F:metal ion binding; GO:0006200:P:ATP catabolic process
H2MD99	atp1a3	ATPase Na+/K+ transporting subunit alpha 3	Locus_2884	1.01958	2.02732	0.0312314	PF00689:Cation_ATPase_C; PF00690:Cation_ATPase_N; PF00122:E1-E2_ATPase; PF00702:Hydrolase	GO:0016021:C:integral to membrane; GO:0005524:F:ATP binding; GO:0019829:F:cation-transporting ATPase activity; GO:0046872:F:metal ion binding; GO:0015077:F:monovalent inorganic cation transmembrane transporter activity; GO:0006754:P:ATP biosynthetic process
I3LZ88	ATP6V0A4	ATPase H+ transporting V0 subunit a4	Locus_8462	2.55953	5.89514	9.19427e-14	PF01496:V_ATPase_I	GO:0000220:C:vacuolar proton-transporting V-type ATPase, V0 domain; GO:0015078:F:hydrogen ion transmembrane transporter activity; GO:0015991:P:ATP hydrolysis coupled proton transport
H3A0R1	ATP6V0D1	ATPase H+ transporting V0 subunit d1	Locus_21610	2.14601	4.42602	1.39659e-09	PF01992:vATP-synt_AC39	GO:0033179:C:proton-transporting V-type ATPase, V0 domain; GO:0015078:F:hydrogen ion transmembrane transporter activity; GO:0015991:P:ATP hydrolysis coupled proton transport
G3QMS3	ATP6V1B2	ATPase H+ transporting V1 subunit B2	Locus_3681	1.19675	2.29223	0.0902549	PF00006:ATP-synt_ab; PF00306:ATP-synt_ab_C; PF02874:ATP-synt_ab_N	GO:0033180:C:proton-transporting V-type ATPase, V1 domain; GO:0005524:F:ATP binding; GO:0016820:F:hydrolase activity, acting on acid anhydrides, catalyzing transmembrane movement of substances; GO:0015991:P:ATP hydrolysis coupled proton transport; GO:0046034:P:ATP metabolic process
F6YL50	ATP6V1C2	ATPase H+ transporting V1 subunit C2	Locus_24671	1.61816	3.06983	7.24734e-06	PF03223:V-ATPase_C	GO:0033180:C:proton-transporting V-type ATPase, V1 domain; GO:0015078:F:hydrogen ion transmembrane transporter activity; GO:0015991:P:ATP hydrolysis coupled proton transport
F1P2K5	ATP8A2	ATPase phospholipid transporting 8A2	Locus_7700	1.17373	2.25594	0.0768541	PF00122:E1-E2_ATPase	GO:0016021:C:integral to membrane; GO:0005524:F:ATP binding; GO:0019829:F:cation-transporting ATPase activity; GO:0000287:F:magnesium ion binding; GO:0004012:F:phospholipid-translocating ATPase activity
H2QEL0	ATP8B1	ATPase phospholipid transporting 8B1	Locus_9880	3.89652	14.8926	3.09468e-23	PF00122:E1-E2_ATPase	GO:0016021:C:integral to membrane; GO:0005524:F:ATP binding; GO:0019829:F:cation-transporting ATPase activity; GO:0000287:F:magnesium ion binding; GO:0004012:F:phospholipid-translocating ATPase activity
G1TBF4	ATP8B2	ATPase phospholipid transporting 8B2	Locus_25110	1.22604	2.33924	0.0980571	PF00122:E1-E2_ATPase	GO:0016021:C:integral to membrane; GO:0005524:F:ATP binding; GO:0019829:F:cation-transporting ATPase activity; GO:0000287:F:magnesium ion binding; GO:0004012:F:phospholipid-translocating ATPase activity
P02701	AVD	avidin	Locus_66280	3.00142	8.00788	5.74676e-12	PF01382:Avidin	GO:0005576:C:extracellular region
F1NIK0	AVL9	AVL9 cell migration associated	Locus_6359	1.27237	2.41558	0.00337247	PF09794:Avl9	GO:0055037:C:recycling endosome; GO:0016477:P:cell migration
H0YVG5	B3GNT2	UDP-GlcNAc:betaGal beta-1,3-N-acetylglucosaminyltransferase 2	Locus_101781	1.02021	2.02821	0.080543	PF01762:Galactosyl_T	GO:0005794:C:Golgi apparatus; GO:0016021:C:integral to membrane; GO:0008378:F:galactosyltransferase activity; GO:0007411:P:axon guidance; GO:0006486:P:protein glycosylation; GO:0007608:P:sensory perception of smell
Q503F2	barx1	BARX homeobox 1	Locus_41146	1.82855	3.55179	0.0250836	PF00046:Homeobox	GO:0005634:C:nucleus; GO:0003700:F:sequence-specific DNA binding transcription factor activity; GO:0000976:F:transcription regulatory region sequence-specific DNA binding; GO:0051216:P:cartilage development; GO:0060037:P:pharyngeal system development; GO:0002053:P:positive regulation of mesenchymal cell proliferation; GO:0006351:P:transcription, DNA-dependent
G3WGI4	BCAS1	breast carcinoma amplified sequence 1	Locus_13480	1.58041	2.99054	1.7584e-05	NO PFAM	NO Gene Ontology
D2HAN3	BMP5	bone morphogenetic protein 5	Locus_7301	1.31777	2.4928	0.00173045	PF00019:TGF_beta; PF00688:TGFb_propeptide	GO:0005576:C:extracellular region; GO:0040007:P:growth; GO:0032348:P:negative regulation of aldosterone biosynthetic process; GO:0008285:P:negative regulation of cell proliferation; GO:2000065:P:negative regulation of cortisol biosynthetic process; GO:0043569:P:negative regulation of insulin-like growth factor receptor signaling pathway; GO:1900006:P:positive regulation of dendrite development; G…
C3Y9Z1	BRAFLDRAFT_126355	hypothetical protein	Locus_45556	1.72607	3.30826	0.00172481	NO PFAM	NO Gene Ontology
C3XZK8	BRAFLDRAFT_65684	hypothetical protein	Locus_12472	2.48155	5.58495	1.79003e-08	PF15281:Consortin_C	GO:0042998:positive regulation of Golgi to plasma membrane protein transport; GO:0016021:C:integral component of membrane; GO:0005802:C:trans-Golgi network
C3YLM4	BRAFLDRAFT_93727	hypothetical protein	Locus_23114	3.19625	9.16576	1.0499e-08	NO PFAM	NO Gene Ontology
G3WYC9	BSN	bassoon presynaptic cytomatrix protein	Locus_56280	2.30531	4.94275	0.0642632	PF05715:zf-piccolo	GO:0045202:C:synapse; GO:0046872:F:metal ion binding
G1KUU3	BSND	barttin CLCNK type accessory beta subunit	Locus_8319	1.6858	3.21718	5.01441e-06	NO PFAM	GO:0016323:C:basolateral plasma membrane; GO:0005887:C:integral to plasma membrane; GO:0043234:C:protein complex; GO:0005254:F:chloride channel activity
G1MXG8	BTG4	BTG anti-proliferation factor 4	Locus_29033	4.29099	19.5757	2.00242e-06	PF07742:BTG	GO:0045930:P:negative regulation of mitotic cell cycle
G3SYN9	BTN1A1	butyrophilin subfamily 1 member A1	Locus_62373	1.75752	3.38116	0.0769857	PF08205:C2-set_2; PF00622:SPRY; PF07686:V-set	GO:0016021:C:integral to membrane
H0YBK5	C1orf127	chromosome 1 open reading frame 127	Locus_15272	2.41857	5.34639	1.4011e-05	PF15094:DUF4556	NO Gene Ontology
M3XL27	C4orf45	chromosome 4 open reading frame 45	Locus_66617	3.89044	14.8299	4.0453e-08	PF15123:DUF4562	NO Gene Ontology
H2TUX1	CA4	carbonic anhydrase 4	Locus_1751	3.81656	14.0896	6.66501e-28	PF00194:Carb_anhydrase	GO:0004089:F:carbonate dehydratase activity; GO:0008270:F:zinc ion binding; GO:0006730:P:one-carbon metabolic process
A8KC11	ca7	carbonic anhydrase 7	Locus_9334	1.23411	2.35236	0.00854466	PF00194:Carb_anhydrase	GO:0004089:F:carbonate dehydratase activity; GO:0008270:F:zinc ion binding; GO:0006730:P:one-carbon metabolic process
E7F1N7	ca9	carbonic anhydrase 9	Locus_8102	1.89084	3.70852	1.52349e-07	PF00194:Carb_anhydrase	GO:0004089:F:carbonate dehydratase activity; GO:0008270:F:zinc ion binding; GO:0006730:P:one-carbon metabolic process
Q4V9I3	cabp2	calcium binding protein 2	Locus_6967	4.34332	20.2987	5.23102e-17	PF13499:EF_hand_5; PF00036:efhand	GO:0005509:F:calcium ion binding
F1NZX9	CACNA1D	calcium voltage-gated channel subunit alpha1 D	Locus_25845	4.26816	19.2683	2.05677e-06	PF08763:Ca_chan_IQ; PF00520:Ion_trans	GO:0005891:C:voltage-gated calcium channel complex; GO:0030018:C:Z disc; GO:0008331:F:high voltage-gated calcium channel activity; GO:0086059:F:voltage-gated calcium channel activity involved in regulation of SA node cell action potential; GO:0007188:P:adenylate cyclase-modulating G-protein coupled receptor signaling pathway; GO:0070509:P:calcium ion import; GO:0086052:P:membrane repolarization i…
I3JFG5	cacnb2	calcium voltage-gated channel auxiliary subunit beta 2	Locus_20239	1.4231	2.6816	0.00301981	PF00625:Guanylate_kin; PF12052:VGCC_beta4Aa_N	GO:0005891:C:voltage-gated calcium channel complex; GO:0005245:F:voltage-gated calcium channel activity
E9QJF8	calb1	calbindin 1	Locus_32702	1.85046	3.60615	0.0828873	PF13405:EF_hand_4; PF13499:EF_hand_5	GO:0005509:F:calcium ion binding
F8WHB5	Camk2a	calcium/calmodulin dependent protein kinase II alpha	Locus_22899	1.48938	2.80769	0.0138818	PF08332:CaMKII_AD	GO:0004683:F:calmodulin-dependent protein kinase activity; GO:0004674:F:protein serine/threonine kinase activity; GO:0006816:P:calcium ion transport; GO:0000082:P:G1/S transition of mitotic cell cycle; GO:0046777:P:protein autophosphorylation; GO:0048168:P:regulation of neuronal synaptic plasticity; GO:0046928:P:regulation of neurotransmitter secretion
G3P6E6	CAMSAP3	calmodulin regulated spectrin associated protein family member 3	Locus_6837	1.16363	2.2402	0.021322	PF08683:CAMSAP_CKK; PF00307:CH	GO:0031175:P:neuron projection development
E7F332	cbln18	cerebellin 18	Locus_33413	5.0566	33.2803	0.000123434	PF00386:C1q	NO Gene Ontology
E9QCL8	CCDC129	coiled-coil domain containing 129	Locus_39770	3.1	8.57419	4.49793e-08	PF14722:KRAP_IP3R_bind; PF14723:SSFA2_C	NO Gene Ontology
M3XGY5	CCDC153	coiled-coil domain containing 153	Locus_20608	1.10867	2.15647	0.0760017	NO PFAM	NO Gene Ontology
F6Q6V2	CCDC190	coiled-coil domain containing 190	Locus_51349	1.35231	2.5532	0.0206523	PF15768:CC190	NO Gene Ontology
H9KZC4	CCL19	C-C motif chemokine ligand 19	Locus_56332	1.60698	3.04614	0.0205172	PF00048:IL8	GO:0005576:C:extracellular region; GO:0006955:P:immune response
G3V896	Ccl28	C-C motif chemokine ligand 28	Locus_30843	1.29639	2.45613	0.0302754	PF00048:IL8	GO:0005615:C:extracellular space; GO:0007204:P:elevation of cytosolic calcium ion concentration; GO:0006955:P:immune response; GO:0007584:P:response to nutrient
H3A4D4	CCSER2	coiled-coil serine rich protein 2	Locus_25687	1.47331	2.77658	0.00102211	NO PFAM	NO Gene Ontology
H2PJL5	CD109	CD109 molecule	Locus_2637	1.13847	2.20148	0.0580178	PF00207:A2M; PF07678:A2M_comp; PF01835:A2M_N; PF07703:A2M_N_2; PF07677:A2M_recep; PF10569:Thiol-ester_cl	GO:0005615:C:extracellular space; GO:0004866:F:endopeptidase inhibitor activity; GO:0010951:P:negative regulation of endopeptidase activity
I3IT20	cd164l2	CD164 molecule like 2	Locus_5830	5.18226	36.309	4.07271e-40	PF05283:MGC-24	GO:0016021:C:integral component of membrane
G1RHH3	CD300LF	CD300 molecule like family member f	Locus_18953	1.63963	3.11586	0.087972	PF07686:V-set	NO Gene Ontology
F7DTG3	CD37	CD37 molecule	Locus_52660	1.62797	3.09078	0.0456745	PF00335:Tetraspannin	GO:0001772:C:immunological synapse; GO:0016021:C:integral to membrane; GO:0002639:P:positive regulation of immunoglobulin production; GO:0002920:P:regulation of humoral immune response
F8W2N6	cdcp2	CUB domain containing protein 2	Locus_17750	2.03651	4.10253	0.000982879	PF00431:CUB; PF00100:Zona_pellucida	GO:0016021:C:integral component of membrane
F7C1R7	CDH20	cadherin 20	Locus_27556	1.29	2.44528	0.0758171	PF00028:Cadherin; PF01049:Cadherin_C	GO:0016021:C:integral to membrane; GO:0005886:C:plasma membrane; GO:0005509:F:calcium ion binding; GO:0007156:P:homophilic cell adhesion
F7CBX9	CDH7	cadherin 7	Locus_13063	1.55288	2.93402	0.0249964	PF00028:Cadherin; PF01049:Cadherin_C	GO:0016021:C:integral to membrane; GO:0005886:C:plasma membrane; GO:0005509:F:calcium ion binding; GO:0007156:P:homophilic cell adhesion
H2QR08	CDK7	cyclin dependent kinase 7	Locus_20392	1.00953	2.01325	0.0229372	PF00069:Pkinase	GO:0005524:F:ATP binding; GO:0004674:F:protein serine/threonine kinase activity
F1R4F9	ceacam1	carcinoembryonic antigen related cell adhesion molecule 1	Locus_20825	2.39644	5.26501	6.98028e-13	PF07679:I-set	NO Gene Ontology
M3XIP7	CHP2	calcineurin like EF-hand protein 2	Locus_20313	1.54085	2.90966	0.00034322	PF13499:EF_hand_5	GO:0005509:F:calcium ion binding
H3A0F2	CHRNA5	cholinergic receptor nicotinic alpha 5 subunit	Locus_10537	3.63803	12.4497	2.77458e-26	PF02931:Neur_chan_LBD; PF02932:Neur_chan_memb	GO:0030054:C:cell junction; GO:0016021:C:integral to membrane; GO:0005886:C:plasma membrane; GO:0045211:C:postsynaptic membrane; GO:0004889:F:acetylcholine-activated cation-selective channel activity
G1NI10	CHRNA9	cholinergic receptor nicotinic alpha 9 subunit	Locus_11138	3.28953	9.77791	3.35707e-07	PF02931:Neur_chan_LBD; PF02932:Neur_chan_memb	GO:0030054:C:cell junction; GO:0016021:C:integral to membrane; GO:0005886:C:plasma membrane; GO:0045211:C:postsynaptic membrane; GO:0004889:F:acetylcholine-activated cation-selective channel activity; GO:0050910:P:detection of mechanical stimulus involved in sensory perception of sound; GO:0007204:P:elevation of cytosolic calcium ion concentration; GO:0042472:P:inner ear morphogenesis
H0X1W0	CHST11	carbohydrate sulfotransferase 11	Locus_21591	1.24916	2.37702	0.0316492	PF03567:Sulfotransfer_2	GO:0016021:C:integral to membrane; GO:0008146:F:sulfotransferase activity; GO:0016051:P:carbohydrate biosynthetic process
C4B8X5	Ci-MORN40	radial spoke protein MORN40	Locus_21141	1.16572	2.24345	0.0901814	PF02493:MORN	NO Gene Ontology
G1NN13	CLCN1	chloride voltage-gated channel 1	Locus_15101	1.80254	3.48834	5.34976e-06	PF00654:Voltage_CLC	GO:0016021:C:integral to membrane; GO:0042383:C:sarcolemma; GO:0005247:F:voltage-gated chloride channel activity; GO:0019227:P:neuronal action potential propagation
G1SLD9	CLCNKA	chloride voltage-gated channel Ka	Locus_23028	1.77614	3.42508	5.20699e-07	PF00571:CBS; PF00654:Voltage_CLC	GO:0016021:C:integral to membrane; GO:0005247:F:voltage-gated chloride channel activity
F7DB74	CLDN10	claudin 10	Locus_44413	2.17315	4.51007	4.91878e-06	PF00822:PMP22_Claudin	GO:0016021:C:integral to membrane; GO:0005886:C:plasma membrane; GO:0005923:C:tight junction; GO:0005198:F:structural molecule activity
Q6E5U5	cldn33c	putative claudin-24	Locus_36351	4.62349	24.6495	4.00115e-34	PF00822:PMP22_Claudin	GO:0016021:C:integral to membrane; GO:0005886:C:plasma membrane; GO:0005923:C:tight junction; GO:0005198:F:structural molecule activity
Q6PBE4	cldn6.1	claudin 6, gene 1 [Xenopus tropicalis]	Locus_481	1.91809	3.77922	5.12142e-05	PF00822:PMP22_Claudin	GO:0016021:C:integral to membrane; GO:0005886:C:plasma membrane; GO:0005923:C:tight junction; GO:0005198:F:structural molecule activity
F1QVR6	cldnj	claudin j	Locus_11901	4.04401	16.4956	3.33855e-29	PF00822:PMP22_Claudin	GO:0016021:C:integral to membrane; GO:0005886:C:plasma membrane; GO:0005923:C:tight junction; GO:0005198:F:structural molecule activity
H2TLL6	CPXM2	carboxypeptidase X, M14 family member 2	Locus_4412	1.2898	2.44494	0.0235422	PF00754:F5_F8_type_C; PF00246:Peptidase_M14	GO:0004181:F:metallocarboxypeptidase activity; GO:0008270:F:zinc ion binding; GO:0007155:P:cell adhesion; GO:0006508:P:proteolysis
H0WIQ9	CRACR2A	calcium release activated channel regulator 2A	Locus_26485	1.04951	2.06982	0.0255117	PF13499:EF_hand_5; PF00071:Ras	GO:0005509:F:calcium ion binding; GO:0005525:F:GTP binding; GO:0015031:P:protein transport; GO:0007264:P:small GTPase mediated signal transduction
H2PF71	CTNND2	catenin delta 2	Locus_9134	1.36397	2.57392	0.00641082	PF00514:Arm	GO:0060997:P:dendritic spine morphogenesis; GO:0060828:P:regulation of canonical Wnt signaling pathway; GO:0016337:P:single organismal cell-cell adhesion; GO:0050808:P:synapse organization; GO:0043204:C:perikaryon
H3AJ95	CXCL12	C-X-C motif chemokine ligand 12	Locus_6893	1.37859	2.60015	0.00635797	PF00048:IL8	GO:0005576:C:extracellular region; GO:0006955:P:immune response
H2L3C1	CXCL14	C-X-C motif chemokine ligand 14	Locus_20533	1.20444	2.30447	0.00279465	PF00048:IL8	GO:0005576:C:extracellular region; GO:0006955:P:immune response
H0ZSN8	CYP39A1	cytochrome P450 family 39 subfamily A member 1	Locus_22754	1.62122	3.07634	0.00351262	PF00067:p450	GO:0009055:F:electron carrier activity; GO:0020037:F:heme binding; GO:0005506:F:iron ion binding; GO:0008396:F:oxysterol 7-alpha-hydroxylase activity; GO:0008387:F:steroid 7-alpha-hydroxylase activity; GO:0006699:P:bile acid biosynthetic process; GO:0006707:P:cholesterol catabolic process
I3JJ90	DCDC2	doublecortin domain containing 2	Locus_104841	2.92809	7.61101	3.85682e-12	PF03607:DCX	GO:0035556:P:intracellular signal transduction
H3AVU5	DCDC2B	doublecortin domain containing 2B	Locus_10684	2.07562	4.21526	4.03399e-07	PF03607:DCX	GO:0035556:P:intracellular signal transduction
H3A7A4	DKK1	dickkopf WNT signaling pathway inhibitor 1	Locus_3707	0.954107	1.93738	0.0357951	PF04706:Dickkopf_N	GO:0005576:C:extracellular region; GO:0007275:P:multicellular organismal development; GO:0030178:P:negative regulation of Wnt receptor signaling pathway
H0WPS3	DLG4	discs large MAGUK scaffold protein 4	Locus_29922	2.99474	7.9709	1.50273e-08	PF00625:Guanylate_kin; PF10608:MAGUK_N_PEST; PF00595:PDZ; PF10600:PDZ_assoc; PF00018:SH3_1	GO:0060997:P:dendritic spine morphogenesis; GO:0045184:P:establishment of protein localization; GO:0035641:P: locomotory exploration behavior; GO:0050885:P:neuromuscular process controlling balance; GO:0006461:P:protein complex assembly; GO:0035418:P:protein localization to synapse; GO:0016188:P:synaptic vesicle maturation; GO:0032281:C:AMPA glutamate receptor complex; GO:0030054:C:cell junction;…
H0ZDG4	DLX1	distal-less homeobox 1	Locus_20729	1.27053	2.41251	0.00191376	PF00046:Homeobox	GO:0005634:C:nucleus; GO:0003682:F:chromatin binding; GO:0003700:F:sequence-specific DNA binding transcription factor activity; GO:0000976:F:transcription regulatory region sequence-specific DNA binding; GO:0021893:P:cerebral cortex GABAergic interneuron fate commitment; GO:0048706:P:embryonic skeletal system development; GO:0021766:P:hippocampus development; GO:0043524:P:negative regulation of n…
I3JXC6	Dlx5	distal-less homeobox 5	Locus_108553	0.889527	1.85257	0.0705335	PF12413:DLL_N; PF00046:Homeobox	GO:0005634:C:nucleus; GO:0003700:F:sequence-specific DNA binding transcription factor activity; GO:0000976:F:transcription regulatory region sequence-specific DNA binding
Q98877	dlx6	distal-less homeobox 6	Locus_13224	3.20584	9.22687	7.93283e-20	PF00046:Homeobox	GO:0005634:C:nucleus; GO:0003700:F:sequence-specific DNA binding transcription factor activity; GO:0000976:F:transcription regulatory region sequence-specific DNA binding; GO:0007275:P:multicellular organismal development
H3AAH2	DNAJC5B	DnaJ heat shock protein family (Hsp40) member C5 beta	Locus_139	3.96899	15.6597	9.86705e-27	PF00226:DnaJ	NO Gene Ontology
F1N7Z9	DNASE1L3	deoxyribonuclease 1 like 3	Locus_38239	1.19729	2.29309	0.0543317	PF03372:Exo_endo_phos	GO:0005634:C:nucleus; GO:0016888:F:endodeoxyribonuclease activity, producing 5'-phosphomonoesters; GO:0006309:P:apoptotic DNA fragmentation
F7G2V2	DNER	delta/notch like EGF repeat containing	Locus_3956	2.0233	4.06514	2.02497e-08	PF00008:EGF; PF12661:hEGF	GO:0030425:C:dendrite; GO:0005769:C:early endosome; GO:0043025:C:neuronal cell body; GO:0005886:C:plasma membrane; GO:0005509:F:calcium ion binding; GO:0007417:P:central nervous system development; GO:0010001:P:glial cell differentiation; GO:0007220:P:Notch receptor processing; GO:0048741:P:skeletal muscle fiber development
H2SS43	DPP10	dipeptidyl peptidase like 10	Locus_29128	1.92036	3.78517	0.000376256	PF00930:DPPIV_N; PF00326:Peptidase_S9	GO:0016020:C:membrane; GO:0008236:F:serine-type peptidase activity; GO:0006508:P:proteolysis
G3RFI2	DSCAM	Down syndrome cell adhesion molecule	Locus_29985	1.81995	3.53069	0.000400432	PF00041:fn3; PF07679:I-set	GO:0007155:P:cell adhesion; GO:0048813:P:dendrite morphogenesis; GO:0070593:P:dendrite self-avoidance; GO:0007626:P:locomotory behavior; GO:0007162:P:negative regulation of cell adhesion; GO:0048842:P:positive regulation of axon extension involved in axon guidance; GO:0042327:P:positive regulation of phosphorylation; GO:0060060:P:post-embryonic retina morphogenesis in camera-type eye; GO:0030424:…
G1MX34	DSCAML1	Down syndrome cell adhesion molecule like 1	Locus_45682	4.66114	25.3012	5.55602e-14	PF00041:fn3; PF07679:I-set	GO:0009986:C:cell surface; GO:0007420:P:brain development; GO:0070593:P:dendrite self-avoidance; GO:0048704:P:embryonic skeletal system morphogenesis; GO:0007156:P:homophilic cell adhesion; GO:0007162:P:negative regulation of cell adhesion
G3SHY6	EDIL3	EGF like repeats and discoidin domains 3	Locus_183	1.42339	2.68216	0.00418815	PF00008:EGF; PF00754:F5_F8_type_C	GO:0005509:F:calcium ion binding; GO:0007155:P:cell adhesion
H3B130	EGR2	early growth response 2	Locus_7682	2.53343	5.78946	0.000191451	PF11928:DUF3446	GO:0003676:F:nucleic acid binding; GO:0008270:F:zinc ion binding
Q29R87	ehf	ETS homologous factor	Locus_60253	2.77325	6.83647	1.04964e-07	PF00178:Ets; PF02198:SAM_PNT	GO:0005634:C:nucleus; GO:0043565:F:sequence-specific DNA binding; GO:0003700:F:sequence-specific DNA binding transcription factor activity
M3XKE7	ELF3	E74 like ETS transcription factor 3	Locus_4362	1.06033	2.08541	0.0964887	PF00178:Ets; PF02198:SAM_PNT	GO:0005634:C:nucleus; GO:0043565:F:sequence-specific DNA binding; GO:0003700:F:sequence-specific DNA binding transcription factor activity
E1BYE9	ELOVL2	ELOVL fatty acid elongase 2	Locus_47064	2.99835	7.99087	1.40533e-17	PF01151:ELO	GO:0005783:C:endoplasmic reticulum; GO:0016021:C:integral to membrane; GO:0009922:F:fatty acid elongase activity; GO:0034626:P:fatty acid elongation, polyunsaturated fatty acid; GO:0042761:P:very long-chain fatty acid biosynthetic process
F6ZBB7	EMB	embigin	Locus_45693	2.8168	7.04599	3.84439e-12	PF07679:I-set	GO:0016021:C:integral component of membrane
H2L630	EMC3	ER membrane protein complex subunit 3	Locus_10424	1.24439	2.36918	0.0155525	PF01956:DUF106	GO:0016020:C:membrane
M3XIM6	EME1	essential meiotic structure-specific endonuclease 1	Locus_2866	2.01438	4.04007	1.16157e-09	PF02732:ERCC4	GO:0003677:F:DNA binding; GO:0004518:F:nuclease activity; GO:0006259:P:DNA metabolic process; GO:0090305:P:nucleic acid phosphodiester bond hydrolysis
H2UWS1	eml2	echinoderm microtubule associated protein like 2	Locus_3553	0.907619	1.87595	0.0740896	PF03451:HELP; PF00400:WD40	GO:0031115:P:negative regulation of microtubule polymerization; GO:0010968:P:regulation of microtubule nucleation
H3AEN5	EMX1	empty spiracles homeobox 1	Locus_61947	4.8181	28.2093	5.03471e-39	PF00046:Homeobox	GO:0005634:C:nucleus; GO:0003700:F:sequence-specific DNA binding transcription factor activity; GO:0000976:F:transcription regulatory region sequence-specific DNA binding
B6CVD7	ERO1A	endoplasmic reticulum oxidoreductase 1 alpha	Locus_55459	1.82601	3.54556	0.00137828	PF04137:ERO1	GO:0005789:C:endoplasmic reticulum membrane; GO:0050660:F:flavin adenine dinucleotide binding; GO:0016671:F:oxidoreductase activity, acting on a sulfur group of donors, disulfide as acceptor; GO:0003756:F:protein disulfide isomerase activity; GO:0050873:P:brown fat cell differentiation; GO:0051085:P:chaperone mediated protein folding requiring cofactor; GO:0022900:P:electron transport chain; GO:0…
I3KNU2	FADS6	fatty acid desaturase 6	Locus_55787	2.65198	6.28531	0.00956423	PF00487:FA_desaturase	GO:0006629:P:lipid metabolic process
H3ALF9	FAM149A	family with sequence similarity 149 member A	Locus_46238	2.8642	7.28132	1.02895e-06	PF12516:DUF3719	NO Gene Ontology
H3ARC7	FAM188B2	protein FAM188B2	Locus_29645	3.1428	8.83238	4.01069e-10	PF13898:DUF4205	NO Gene Ontology
H0YRR6	FAM76A	family with sequence similarity 76 member A	Locus_17712	1.45939	2.74992	0.0474057	PF16046:FAM76	NO Gene Ontology
G1M2V1	FAT4	FAT atypical cadherin 4	Locus_21828	1.26533	2.40381	0.0268329	PF00028:Cadherin; PF00008:EGF; PF07645:EGF_CA; PF02210:Laminin_G_2	GO:0016021:C:integral to membrane; GO:0005886:C:plasma membrane; GO:0005509:F:calcium ion binding; GO:0007156:P:homophilic cell adhesion
H2RCH4	FER1L6	fer-1 like family member 6	Locus_27562	2.39684	5.26647	6.46474e-11	PF00168:C2; PF08150:FerB; PF08151:FerI	GO:0016021:C:integral to membrane
I3J9F6	FEV	FEV, ETS transcription factor	Locus_21499	3.04098	8.23052	1.29241e-17	PF00178:Ets	GO:0005634:C:nucleus; GO:0043565:F:sequence-specific DNA binding; GO:0003700:F:sequence-specific DNA binding transcription factor activity
G1P8H8	FGF1	fibroblast growth factor 1	Locus_30925	1.31157	2.48211	0.0895882	PF00167:FGF	GO:0005829:C:cytosol; GO:0005615:C:extracellular space; GO:0005578:C:proteinaceous extracellular matrix; GO:0008201:F:heparin binding; GO:0060681:P:branch elongation involved in ureteric bud branching; GO:0034605:P:cellular response to heat; GO:0008543:P:fibroblast growth factor receptor signaling pathway; GO:0030324:P:lung development; GO:0072163:P:mesonephric epithelium development; GO:0001759:…
H3AWG9	FGF3	fibroblast growth factor 3	Locus_6109	2.09763	4.28006	5.54832e-06	PF00167:FGF	GO:0008543:P:fibroblast growth factor receptor signaling pathway; GO:0043066:P:negative regulation of apoptotic process; GO:0014032:P:neural crest cell development; GO:0048665:P:neuron fate specification; GO:0043049:P:otic placode formation; GO:0048840:P:otolith development; GO:0007422:P:peripheral nervous system development; GO:0048920:P:posterior lateral line neuromast primordium migration; GO:…
I3K9S9	FHL2	four and a half LIM domains 2	Locus_16144	2.29786	4.91729	1.21307e-10	PF00412:LIM	GO:0008270:F:zinc ion binding
Q68FN5	fhl5	four and a half LIM domains 5	Locus_22672	2.91627	7.54894	2.25086e-15	PF00412:LIM	GO:0008270:F:zinc ion binding
H0WG30	FLVCR1	feline leukemia virus subgroup C cellular receptor 1	Locus_23255	1.1594	2.23365	0.0435416	PF07690:MFS_1	GO:0016021:C:integral to membrane; GO:0055085:P:transmembrane transport
G1QM86	FNDC7	fibronectin type III domain containing 7	Locus_27539	5.0519	33.1721	8.13536e-42	PF00041:fn3	NO Gene Ontology
F7BLX2	foxe1	forkhead box E1	Locus_61297	1.63656	3.10924	0.00348518	PF00250:Fork_head	GO:0005634:C:nucleus; GO:0043565:F:sequence-specific DNA binding; GO:0003700:F:sequence-specific DNA binding transcription factor activity; GO:0048703:P:embryonic viscerocranium morphogenesis; GO:0003419:P:growth plate cartilage chondrocyte proliferation; GO:0006351:P:transcription, DNA-dependent
Q568V0	foxg1	forkhead box G1	Locus_42251	3.51359	11.4208	0.000187706	PF00250:Fork_head	GO:0005667:C:transcription factor complex; GO:0008301:F:DNA binding, bending; GO:0003690:F:double-stranded DNA binding; GO:0003705:F:RNA polymerase II distal enhancer sequence-specific DNA binding transcription factor activity; GO:0043565:F:sequence-specific DNA binding; GO:0008134:F:transcription factor binding; GO:0016199:P:axon midline choice point recognition; GO:0021954:P:central nervous sys…
H2T500	foxl2	forkhead box L2	Locus_1026	2.44259	5.43618	5.75095e-10	PF00250:Fork_head	GO:0005634:C:nucleus; GO:0043565:F:sequence-specific DNA binding; GO:0003700:F:sequence-specific DNA binding transcription factor activity; GO:0006351:P:transcription, DNA-dependent
H3A644	FRZB	frizzled-related protein	Locus_11004	1.78998	3.45811	3.38561e-07	PF01392:Fz; PF01759:NTR	GO:0005576:C:extracellular region; GO:0007275:P:multicellular organismal development; GO:0016055:P:Wnt receptor signaling pathway
F1PBE3	FSTL5	follistatin like 5	Locus_7942	1.91856	3.78046	0.0250007	PF07679:I-set; PF07648:Kazal_2	GO:0005509:F:calcium ion binding
H2UV08	gal3st1	galactose-3-O-sulfotransferase 1	Locus_21549	2.8445	7.18258	1.73807e-13	PF06990:Gal-3-0_sulfotr	GO:0005794:C:Golgi apparatus; GO:0016021:C:integral to membrane; GO:0001733:F:galactosylceramide sulfotransferase activity; GO:0009058:P:biosynthetic process
F6X0D9	GCM2	glial cells missing homolog 2	Locus_21954	2.05042	4.14227	1.03148e-07	PF03615:GCM	GO:0005634:C:nucleus; GO:0043565:F:sequence-specific DNA binding; GO:0030154:P:cell differentiation; GO:0006874:P:cellular calcium ion homeostasis; GO:0030643:P:cellular phosphate ion homeostasis; GO:0071310:P:cellular response to organic substance; GO:0043066:P:negative regulation of apoptotic process; GO:0060017:P:parathyroid gland development; GO:0006355:P:regulation of transcription, DNA-depe…
G1L195	GCNT4	glucosaminyl (N-acetyl) transferase 4, core 2	Locus_23377	1.93299	3.81845	3.22747e-05	PF02485:Branch	GO:0016020:C:membrane; GO:0008375:F:acetylglucosaminyltransferase activity; GO:0048872:P:homeostasis of number of cells; GO:0002121:P:inter-male aggressive behavior; GO:0060993:P:kidney morphogenesis; GO:0042403:P:thyroid hormone metabolic process; GO:0048729:P:tissue morphogenesis
H2TFT5	GDI1	GDP dissociation inhibitor 1	Locus_48331	1.68689	3.21962	5.64793e-05	PF00996:GDI	GO:0005093:F:Rab GDP-dissociation inhibitor activity; GO:0015031:P:protein transport
I3KSX4	gfi1	growth factor independent 1 transcriptional repressor	Locus_71841	3.58364	11.989	1.51368e-20	PF00096:zf-C2H2	GO:0003676:F:nucleic acid binding; GO:0008270:F:zinc ion binding
H2LR62	gipc3	GIPC PDZ domain containing family member 3	Locus_42734	4.10613	17.2214	4.91633e-27	PF00595:PDZ	NO Gene Ontology
E1BPE6	GJB4	gap junction protein beta 4	Locus_126318	2.31432	4.97369	0.000605414	PF00029:Connexin; PF10582:Connexin_CCC	GO:0005922:C:connexon complex; GO:0016021:C:integral to membrane; GO:0007154:P:cell communication; GO:0042048:P:olfactory behavior; GO:0007608:P:sensory perception of smell
D2H5I6	GPR52	G protein-coupled receptor 52	Locus_34049	3.86881	14.6092	5.81072e-16	PF00001:7tm_1	GO:0016021:C:integral to membrane; GO:0004930:F:G-protein coupled receptor activity
G3QUR3	GPX2	glutathione peroxidase 2	Locus_127329	4.31478	19.9012	4.02169e-20	PF00255:GSHPx	GO:0004602:F:glutathione peroxidase activity; GO:0006979:P:response to oxidative stress
Q6ZM86	grid2ip	Grid2 interacting protein	Locus_66123	1.76835	3.40664	0.00472741	PF02181:FH2; PF00595:PDZ	GO:0030054:C:cell junction; GO:0005886:C:plasma membrane; GO:0045211:C:postsynaptic membrane; GO:0030036:P:actin cytoskeleton organization
H3AFP5	GRXCR1	glutaredoxin and cysteine rich domain containing 1	Locus_70313	4.99184	31.8195	9.10343e-10	PF00462:Glutaredoxin	GO:0009055:F:electron carrier activity; GO:0015035:F:protein disulfide oxidoreductase activity; GO:0045454:P:cell redox homeostasis
H3AS56	GRXCR2	glutaredoxin and cysteine rich domain containing 2	Locus_37643	4.52663	23.0489	4.50577e-08	NO PFAM	GO:0007605:P:sensory perception of sound
H0Z106	HCN4	hyperpolarization activated cyclic nucleotide gated potassium channel 4	Locus_72647	4.76355	27.1627	4.30013e-15	PF00027:cNMP_binding; PF00520:Ion_trans; PF08412:Ion_trans_N	GO:0016021:C:integral to membrane; GO:0005222:F:intracellular cAMP activated cation channel activity; GO:0005249:F:voltage-gated potassium channel activity; GO:0001701:P:in utero embryonic development; GO:0008016:P:regulation of heart contraction
G1K9X0	HEY2	hes related family bHLH transcription factor with YRPW motif 2	Locus_8932	1.54753	2.92316	8.41529e-05	PF07527:Hairy_orange; PF00010:HLH	GO:0005737:C:cytoplasm; GO:0016580:C:Sin3 complex; GO:0017053:C:transcriptional repressor complex; GO:0035939:F:microsatellite binding; GO:0000988:F:protein binding transcription factor activity; GO:0000983:F:RNA polymerase II core promoter sequence-specific DNA binding transcription factor activity; GO:0009948:P:anterior/posterior axis specification; GO:0060842:P:arterial endothelial cell differ…
F1QTJ6	hmx2	H6 family homeobox 2	Locus_20476	2.53735	5.80523	1.8308e-06	PF00046:Homeobox	GO:0005634:C:nucleus; GO:0043565:F:sequence-specific DNA binding; GO:0003700:F:sequence-specific DNA binding transcription factor activity; GO:0042472:P:inner ear morphogenesis; GO:0048916:P:posterior lateral line development
B7ZD71	hmx4	H6 family homeobox 4	Locus_72331	4.0566	16.6402	5.29416e-21	PF00046:Homeobox	GO:0005634:C:nucleus; GO:0043565:F:sequence-specific DNA binding; GO:0003700:F:sequence-specific DNA binding transcription factor activity; GO:1900052:P:regulation of retinoic acid biosynthetic process
H3BCI7	HOXA2	homeobox A2	Locus_1101	1.77311	3.4179	3.20661e-06	PF00046:Homeobox	GO:0005634:C:nucleus; GO:0043565:F:sequence-specific DNA binding; GO:0003700:F:sequence-specific DNA binding transcription factor activity; GO:0007275:P:multicellular organismal development
G3UWE8	Hpn	hepsin	Locus_41158	1.59056	3.01166	0.0105206	PF09272:Hepsin-SRCR; PF00089:Trypsin	GO:0005886:C:plasma membrane; GO:0005044:F:scavenger receptor activity; GO:0004252:F:serine-type endopeptidase activity; GO:0070008:F:serine-type exopeptidase activity; GO:0006508:P:proteolysis
A2BFP6	hsd20b2	hydroxysteroid (20-beta) dehydrogenase 2	Locus_54925	1.87591	3.67034	0.0171171	PF00106:adh_short	GO:0016491:F:oxidoreductase activity; GO:0055114:P:oxidation-reduction process
F1NC26	HSPA4L	heat shock protein family A (Hsp70) member 4 like	Locus_10075	1.45466	2.74092	0.000149898	PF00012:HSP70	GO:0005524:F:ATP binding
G1NBX2	ICA1	islet cell autoantigen 1	Locus_8288	1.10982	2.15819	0.0163446	PF06456:Arfaptin; PF04629:ICA69	GO:0005829:C:cytosol; GO:0005634:C:nucleus; GO:0030667:C:secretory granule membrane; GO:0030672:C:synaptic vesicle membrane
H3ADP6	IL17B	interleukin 17B	Locus_59746	2.5772	5.9678	0.0157987	PF06083:IL17	GO:0005576:C:extracellular region; GO:0006954:P:inflammatory response
H3ANI2	IL17RD	interleukin 17 receptor D	Locus_61482	2.14986	4.43786	0.000242717	PF08357:SEFIR	GO:0007165:P:signal transduction
H3AP42	INSM1	INSM transcriptional repressor 1	Locus_101780	1.61185	3.05645	0.00121667	PF00096:zf-C2H2	GO:0003676:F:nucleic acid binding; GO:0008270:F:zinc ion binding
H3BDQ6	INSM2	INSM transcriptional repressor 2	Locus_72160	4.31143	19.855	3.46315e-22	PF00096:zf-C2H2	GO:0003676:F:nucleic acid binding; GO:0008270:F:zinc ion binding
Q4S1Q2	IRX5	iroquois homeobox 5	Locus_2676	0.954642	1.9381	0.0612433	PF05920:Homeobox_KN	GO:0005634:C:nucleus; GO:0043565:F:sequence-specific DNA binding; GO:0003700:F:sequence-specific DNA binding transcription factor activity
I3JUT0	jag1	Jagged 1	Locus_9245	1.42461	2.68442	0.00100194	PF01414:DSL; PF00008:EGF; PF07645:EGF_CA; PF07657:MNNL	GO:0016021:C:integral to membrane; GO:0005509:F:calcium ion binding; GO:0007275:P:multicellular organismal development; GO:0007219:P:Notch signaling pathway
H3AJV3	KANK2	KN motif and ankyrin repeat domains 2	Locus_393	1.38985	2.62051	0.00131301	PF12796:Ank_2; PF12075:KN_motif	GO:0032836:P:glomerular basement membrane development; GO:0072015:P:glomerular visceral epithelial cell development
G3N639	KCNA5	potassium voltage-gated channel subfamily A member 5	Locus_38311	3.63123	12.3911	3.24782e-23	PF00520:Ion_trans; PF02214:K_tetra	GO:0008076:C:voltage-gated potassium channel complex; GO:0005249:F:voltage-gated potassium channel activity; GO:0051260:P:protein homooligomerization
G3QBV2	KCNAB3	potassium voltage-gated channel subfamily A regulatory beta subunit 3	Locus_2205	4.4225	21.4439	1.13508e-29	PF00248:Aldo_ket_red	GO:0005737:C:cytoplasm; GO:0016021:C:integral to membrane; GO:0005249:F:voltage-gated potassium channel activity
H2LBV7	KCNJ10	potassium voltage-gated channel subfamily J member 10	Locus_35050	1.9859	3.9611	0.00992036	PF01007:IRK	GO:0016021:C:integral to membrane; GO:0005242:F:inward rectifier potassium channel activity
D2HP89	KCNJ16	potassium voltage-gated channel subfamily J member 16	Locus_106024	1.4848	2.79879	0.00703599	PF01007:IRK	GO:0016021:C:integral to membrane; GO:0005886:C:plasma membrane; GO:0005242:F:inward rectifier potassium channel activity
Q8AYS8	KCNMA1	potassium calcium-activated channel subfamily M alpha 1	Locus_4406	2.04695	4.13232	1.40483e-06	PF03493:BK_channel_a; PF00520:Ion_trans; PF02254:TrkA_N	GO:0016324:C:apical plasma membrane; GO:0005901:C:caveola; GO:0005783:C:endoplasmic reticulum; GO:0009897:C:external side of plasma membrane; GO:0045211:C:postsynaptic membrane; GO:0043195:C:terminal bouton; GO:0008076:C:voltage-gated potassium channel complex; GO:0060072:F:large conductance calcium-activated potassium channel activity; GO:0046872:F:metal ion binding; GO:0005249:F:voltage-gated p…
G1NGM6	KIAA1211	uncharacterized	Locus_20891	1.6813	3.20718	0.000400432	PF15262:DUF4592	NO Gene Ontology
D3ZYC9	Kif17	kinesin family member 17	Locus_10507	1.6151	3.06332	0.00989778	PF00225:Kinesin	GO:0005871:C:kinesin complex; GO:0005874:C:microtubule; GO:0005524:F:ATP binding; GO:0003777:F:microtubule motor activity; GO:0007018:P:microtubule-based movement; GO:0031503:P:protein complex localization; GO:0016192:P:vesicle-mediated transport
H2SJ69	KIF1A	kinesin family member 1A	Locus_46368	3.46859	11.07	1.46403e-11	PF12473:DUF3694; PF00498:FHA; PF12423:KIF1B; PF00225:Kinesin; PF00169:PH	GO:0005874:C:microtubule; GO:0005875:C:microtubule associated complex; GO:0005524:F:ATP binding; GO:0003777:F:microtubule motor activity; GO:0005543:F:phospholipid binding; GO:0007018:P:microtubule-based movement
Q8UUL1	KIFC1	kinesin family member C1	Locus_132	1.02563	2.03585	0.0749239	PF00225:Kinesin	GO:0005874:C:microtubule; GO:0005875:C:microtubule associated complex; GO:0005524:F:ATP binding; GO:0003777:F:microtubule motor activity; GO:0007018:P:microtubule-based movement
H2UPE2	kit	KIT proto-oncogene receptor tyrosine kinase	Locus_101804	1.13071	2.18966	0.0223174	PF07679:I-set; PF07714:Pkinase_Tyr	GO:0016021:C:integral to membrane; GO:0005524:F:ATP binding; GO:0004714:F:transmembrane receptor protein tyrosine kinase activity; GO:0007169:P:transmembrane receptor protein tyrosine kinase signaling pathway
H3A8W6	KLF4	Kruppel like factor 4	Locus_8424	1.08015	2.11425	0.0637667	NO PFAM	GO:0003676:F:nucleic acid binding; GO:0008270:F:zinc ion binding
I3MHJ2	KLHL32	kelch like family member 32	Locus_68950	1.84747	3.59868	0.0392494	PF07707:BACK; PF00651:BTB; PF01344:Kelch_1	NO Gene Ontology
F6RN26	KLHL5	kelch like family member 5	Locus_5617	1.84025	3.58072	6.56035e-07	PF07707:BACK; PF00651:BTB; PF01344:Kelch_1	GO:0016567:P:protein ubiquitination; GO:0031463:C:Cul3-RING ubiquitin ligase complex
F1LY04	Ksr2	kinase suppressor of ras 2	Locus_25877	1.8274	3.54897	0.0797518	PF07714:Pkinase_Tyr	GO:0005524:F:ATP binding; GO:0046872:F:metal ion binding; GO:0004674:F:protein serine/threonine kinase activity; GO:0035556:P:intracellular signal transduction
F1QTM6	ky	kyphoscoliosis peptidase	Locus_36222	2.00588	4.01633	2.60352e-08	PF01841:Transglut_core	NO Gene Ontology
G1LM02	LAMA1	laminin subunit alpha 1	Locus_14504	1.09329	2.1336	0.0110868	PF00052:Laminin_B; PF00053:Laminin_EGF; PF00054:Laminin_G_1; PF06008:Laminin_I; PF06009:Laminin_II; PF00055:Laminin_N	GO:0005911:C:cell-cell junction; GO:0005615:C:extracellular space; GO:0005606:C:laminin-1 complex; GO:0005608:C:laminin-3 complex; GO:0005201:F:extracellular matrix structural constituent; GO:0043208:F:glycosphingolipid binding; GO:0060445:P:branching involved in salivary gland morphogenesis; GO:0007155:P:cell adhesion; GO:0007166:P:cell surface receptor signaling pathway; GO:0060441:P:epithelial…
G1MVP4	LHX3	LIM homeobox 3	Locus_74461	4.02348	16.2625	1.21435e-20	PF00046:Homeobox; PF00412:LIM	GO:0005667:C:transcription factor complex; GO:0000988:F:protein binding transcription factor activity; GO:0043565:F:sequence-specific DNA binding; GO:0003700:F:sequence-specific DNA binding transcription factor activity; GO:0008270:F:zinc ion binding; GO:0048839:P:inner ear development; GO:0021526:P:medial motor column neuron differentiation; GO:0008045:P:motor neuron axon guidance; GO:0043066:P:…
F1P4G9	LHX8	LIM homeobox 8	Locus_22931	2.50956	5.69445	8.77735e-11	PF00046:Homeobox; PF00412:LIM	GO:0005634:C:nucleus; GO:0043565:F:sequence-specific DNA binding; GO:0003700:F:sequence-specific DNA binding transcription factor activity; GO:0008270:F:zinc ion binding; GO:0008585:P:female gonad development; GO:0021884:P:forebrain neuron development; GO:0007611:P:learning or memory; GO:0042475:P:odontogenesis of dentin-containing tooth
Q4RBH1	LITAF	lipopolysaccharide induced TNF factor	Locus_15640	1.23423	2.35256	0.0318161	PF10601:zf-LITAF-like	GO:0016021:C:integral component of membrane
G3Q871	LOC100174872	alpha-2,8-sialyltransferase ST8Sia I	Locus_8012	1.03102	2.04347	0.0720193	PF00777:Glyco_transf_29	GO:0030173:C:integral to Golgi membrane; GO:0008373:F:sialyltransferase activity; GO:0006486:P:protein glycosylation
G3P651	LOC100174886	Rhesus-associated glycoprotein	Locus_39452	1.55425	2.9368	4.49484e-05	PF00909:Ammonium_transp	GO:0016021:C:integral to membrane; GO:0008519:F:ammonium transmembrane transporter activity; GO:0072488:P:ammonium transmembrane transport
F6REZ6	LOC100179625	uncharacterized LOC100179625	Locus_62268	2.89528	7.4399	0.00253562	NO PFAM	NO Gene Ontology
E7F7S3	LOC100330575	proprotein convertase subtilisin/kexin type 5-like	Locus_10566	3.78103	13.7469	1.68773e-27	NO PFAM	GO:0016021:C:integral component of membrane
G1NN79	LOC100549202	opsin-5-like	Locus_32336	4.04556	16.5134	7.25992e-12	PF00001:7tm_1	GO:0016021:C:integral to membrane; GO:0004930:F:G-protein coupled receptor activity; GO:0009881:F:photoreceptor activity; GO:0018298:P:protein-chromophore linkage
G1MT12	LOC100551127	transcription factor HES-5-like	Locus_27975	1.55088	2.92996	1.44586e-05	PF07527:Hairy_orange; PF00010:HLH	GO:0005634:C:nucleus; GO:0003677:F:DNA binding; GO:0006355:P:regulation of transcription, DNA-dependent; GO:0006351:P:transcription, DNA-dependent
G3UGB7	LOC100662049	DNA dC->dU-editing enzyme APOBEC-3F-like	Locus_20836	2.65655	6.30524	1.45678e-07	PF08210:APOBEC_N	GO:0005737:C:cytoplasm; GO:0005634:C:nucleus; GO:0004126:F:cytidine deaminase activity; GO:0008270:F:zinc ion binding; GO:0070383:P:DNA cytosine deamination; GO:0045869:P:negative regulation of retroviral genome replication; GO:0010529:P:negative regulation of transposition
F7FBL3	LOC100681753	mucin-19-like	Locus_37127	4.40634	21.2052	0.0251401	PF08742:C8; PF01826:TIL; PF00094:VWD	NO Gene Ontology
I3IYV1	LOC100692992	glycerophosphodiester phosphodiesterase domain-containing protein 5-like	Locus_25306	2.09057	4.25917	4.77761e-07	PF03009:GDPD	GO:0008889:F:glycerophosphodiester phosphodiesterase activity; GO:0006071:P:glycerol metabolic process; GO:0006629:P:lipid metabolic process
I3JCV4	LOC100695939	fascin-2-like	Locus_77460	3.34545	10.1644	0.0174138	PF06268:Fascin	GO:0005737:C:cytoplasm; GO:0005856:C:cytoskeleton
I3J1L1	LOC100696512	outer dense fiber protein 3-like protein 2	Locus_68682	1.82879	3.55239	0.0392434	PF07004:SHIPPO-rpt	GO:0007286:P:spermatid development
I3JYT1	LOC100698459	calretinin-like	Locus_43200	2.26449	4.80485	0.0401081	PF13405:EF_hand_4; PF13499:EF_hand_5	GO:0005509:F:calcium ion binding
I3J954	LOC100698576	uncharacterized LOC100698576	Locus_34684	1.11735	2.16949	0.0903541	PF04784:DUF547; PF00462:Glutaredoxin	GO:0009055:F:electron carrier activity; GO:0015035:F:protein disulfide oxidoreductase activity; GO:0045454:P:cell redox homeostasis
I3K4L4	LOC100698977	carbonic anhydrase 4-like	Locus_25447	2.67728	6.3965	6.28341e-13	PF00194:Carb_anhydrase	GO:0004089:F:carbonate dehydratase activity; GO:0008270:F:zinc ion binding; GO:0006730:P:one-carbon metabolic process
I3IW39	LOC100707706	syntaxin-binding protein 5-like	Locus_118329	2.62003	6.14764	2.68529e-06	PF08596:Lgl_C; PF08366:LLGL; PF00400:WD40	GO:0016021:C:integral to membrane; GO:0016192:P:vesicle-mediated transport
I3K452	LOC100708927	excitatory amino acid transporter 1-like	Locus_1309	3.50204	11.3297	8.94736e-24	PF00375:SDF	GO:0016020:C:membrane; GO:0017153:F:sodium:dicarboxylate symporter activity
I3JSU1	LOC100709319	prominin-1-A-like	Locus_27027	1.48835	2.80567	0.000125929	PF05478:Prominin	GO:0016021:C:integral to membrane
I3JD08	LOC100711942	BTB/POZ domain-containing protein 17-like	Locus_6567	1.62483	3.08406	7.94311e-06	PF07707:BACK; PF00651:BTB	NO Gene Ontology
G3WP80	LOC100933821	transcription factor HES-5-like	Locus_52662	1.41507	2.66673	0.000830279	PF07527:Hairy_orange; PF00010:HLH	GO:0005634:C:nucleus; GO:0003677:F:DNA binding; GO:0006355:P:regulation of transcription, DNA-dependent; GO:0006351:P:transcription, DNA-dependent
H2USS3	LOC101062121	plasma membrane calcium-transporting ATPase 1-like	Locus_5638	2.08575	4.24496	6.7979e-07	PF12424:ATP_Ca_trans_C; PF00689:Cation_ATPase_C; PF00690:Cation_ATPase_N; PF00122:E1-E2_ATPase; PF00702:Hydrolase	GO:0016021:C:integral to membrane; GO:0005524:F:ATP binding; GO:0005388:F:calcium-transporting ATPase activity; GO:0046872:F:metal ion binding
H2RKH0	LOC101063520	protocadherin-10-like	Locus_4680	1.09681	2.13881	0.0265652	PF00028:Cadherin; PF08266:Cadherin_2	GO:0016021:C:integral to membrane; GO:0005886:C:plasma membrane; GO:0005509:F:calcium ion binding; GO:0007156:P:homophilic cell adhesion
H2UJ21	LOC101068679	rap guanine nucleotide exchange factor 3-like	Locus_13227	1.14335	2.20893	0.015167	PF00027:cNMP_binding; PF00610:DEP; PF00617:RasGEF; PF00618:RasGEF_N	GO:0005952:C:cAMP-dependent protein kinase complex; GO:0008603:F:cAMP-dependent protein kinase regulator activity; GO:0005085:F:guanyl-nucleotide exchange factor activity; GO:0051056:P:regulation of small GTPase mediated signal transduction; GO:0007264:P:small GTPase mediated signal transduction
H2V7B8	LOC101069727	homeobox protein not2-like	Locus_104042	1.41691	2.67013	0.0988918	PF00046:Homeobox	GO:0005634:C:nucleus; GO:0043565:F:sequence-specific DNA binding; GO:0003700:F:sequence-specific DNA binding transcription factor activity
H2LYI2	LOC101162428	serine/threonine-protein kinase/endoribonuclease IRE1-like	Locus_20364	1.39936	2.63785	0.00341954	PF00069:Pkinase; PF06479:Ribonuc_2-5A	GO:0005524:F:ATP binding; GO:0004674:F:protein serine/threonine kinase activity; GO:0004540:F:ribonuclease activity; GO:0006397:P:mRNA processing
H2L9C5	LOC101167873	glycerol-3-phosphate acyltransferase 3-like	Locus_2945	2.99878	7.99322	5.033e-18	PF01553:Acyltransferase	GO:0016746:F:transferase activity, transferring acyl groups
H2LKC2	LOC101173302	somatostatin-1B-like	Locus_144899	3.31994	9.98626	0.00112396	PF03002:Somatostatin	GO:0005576:C:extracellular region
I3JRS1	LOC102078197	urokinase plasminogen activator surface receptor-like	Locus_37754	1.36834	2.58173	0.0725933	PF00021:UPAR_LY6	NO Gene Ontology
H2ZW29	LOC102347382	forkhead box protein I1c-like	Locus_129292	2.61779	6.13809	1.49352e-06	PF00250:Fork_head	GO:0005634:C:nucleus; GO:0043565:F:sequence-specific DNA binding; GO:0003700:F:sequence-specific DNA binding transcription factor activity; GO:0006351:P:transcription, DNA-dependent
H3ATC6	LOC102347837	forkhead box protein L2-like	Locus_59593	2.15845	4.46435	0.00102175	PF00250:Fork_head	GO:0005634:C:nucleus; GO:0043565:F:sequence-specific DNA binding; GO:0003700:F:sequence-specific DNA binding transcription factor activity; GO:0006351:P:transcription, DNA-dependent
H3A301	LOC102348346	GTP-binding protein Rhes-like	Locus_22080	1.60098	3.03349	0.0102867	PF00071:Ras	GO:0016020:C:membrane; GO:0005525:F:GTP binding; GO:0003924:F:GTPase activity; GO:0007264:P:small GTPase mediated signal transduction
H3A3A9	LOC102350925	UDP-GlcNAc:betaGal beta-1,3-N-acetylglucosaminyltransferase 7-like	Locus_48897	1.65734	3.15435	0.0257979	PF01762:Galactosyl_T	GO:0005794:C:Golgi apparatus; GO:0016021:C:integral to membrane; GO:0008378:F:galactosyltransferase activity; GO:0006486:P:protein glycosylation
H3AA62	LOC102351073	carbonic anhydrase 4-like	Locus_25541	3.43895	10.845	7.56479e-06	PF00194:Carb_anhydrase	GO:0004089:F:carbonate dehydratase activity; GO:0008270:F:zinc ion binding; GO:0006730:P:one-carbon metabolic process
H2ZXA3	LOC102353403	collagen alpha-1(XXI) chain-like	Locus_104490	3.20243	9.20506	8.51181e-16	PF00092:VWA	NO Gene Ontology
H3B2L7	LOC102356093	cytoglobin-1-like	Locus_108621	1.56013	2.94881	0.00398937	PF00042:Globin	GO:0020037:F:heme binding; GO:0005506:F:iron ion binding; GO:0019825:F:oxygen binding; GO:0005344:F:oxygen transporter activity
H3A2Y5	LOC102356269	serine/threonine-protein kinase Sgk1-like	Locus_36184	2.83978	7.15909	1.68067e-13	PF00069:Pkinase; PF00433:Pkinase_C; PF00787:PX	GO:0005524:F:ATP binding; GO:0035091:F:phosphatidylinositol binding; GO:0004674:F:protein serine/threonine kinase activity; GO:0007154:P:cell communication
H3ARB6	LOC102358523	V-type proton ATPase subunit S1-like	Locus_3795	2.39722	5.26787	5.66304e-12	PF05827:ATP-synt_S1	GO:0033180:C:proton-transporting V-type ATPase, V1 domain; GO:0046933:F:proton-transporting ATP synthase activity, rotational mechanism; GO:0046961:F:proton-transporting ATPase activity, rotational mechanism; GO:0015991:P:ATP hydrolysis coupled proton transport
H3ACI9	LOC102359552	slit homolog 1 protein-like	Locus_74660	3.65177	12.5687	1.59673e-09	PF00560:LRR_1	GO:0016021:C:integral component of membrane
H3AAZ1	LOC102360190	potassium channel subfamily K member 13-like	Locus_16174	4.55387	23.4883	0.00163973	PF07885:Ion_trans_2	GO:0016021:C:integral to membrane; GO:0005267:F:potassium channel activity
H3AKB6	LOC102361023	actin-like	Locus_13226	2.26819	4.81719	8.84309e-07	PF00022:Actin	NO Gene Ontology
H3AA02	LOC102361179	fish-egg lectin-like	Locus_59291	2.23862	4.71946	0.000105967	PF06462:Hyd_WA	NO Gene Ontology
H3ATN8	LOC102362065	neural-cadherin-like	Locus_6619	1.21526	2.32183	0.0149672	PF00028:Cadherin; PF01049:Cadherin_C; PF00008:EGF; PF12661:hEGF; PF02210:Laminin_G_2	GO:0016021:C:integral to membrane; GO:0005886:C:plasma membrane; GO:0005509:F:calcium ion binding; GO:0007156:P:homophilic cell adhesion
H3AXC6	LOC102362136	chemokine-like receptor 1	Locus_23145	3.46837	11.0684	1.58166e-15	PF00001:7tm_1	GO:0016021:C:integral to membrane; GO:0004982:F:N-formyl peptide receptor activity
M3XI38	LOC102362150	occludin-like	Locus_40346	1.3977	2.63481	0.0217683	PF01284:MARVEL; PF07303:Occludin_ELL	GO:0016021:C:integral to membrane; GO:0005923:C:tight junction; GO:0005198:F:structural molecule activity
H3AHI6	LOC102362582	heme-binding protein 1-like	Locus_4361	1.12073	2.17458	0.00656258	PF04832:SOUL	NO Gene Ontology
H3AFY3	LOC102363509	gap junction beta-2 protein-like	Locus_10347	1.18308	2.27062	0.0360791	PF00029:Connexin; PF10582:Connexin_CCC	GO:0005922:C:connexon complex; GO:0016021:C:integral to membrane; GO:0007154:P:cell communication
H3B370	LOC102363937	uncharacterized LOC102363937	Locus_9704	3.0261	8.14606	9.3185e-12	PF00106:adh_short	NO Gene Ontology
H3B481	LOC102365531	putative UDP-GlcNAc:betaGal beta-1,3-N-acetylglucosaminyltransferase LOC100288842	Locus_59240	4.69978	25.9881	8.91159e-28	PF01762:Galactosyl_T	GO:0005794:C:Golgi apparatus; GO:0016021:C:integral to membrane; GO:0008378:F:galactosyltransferase activity; GO:0006486:P:protein glycosylation
H3AJS9	LOC102366366	uncharacterized LOC102366366	Locus_36157	3.66797	12.7107	1.48035e-22	NO PFAM	GO:0016021:C:integral component of membrane
H3AYT0	LOC102367588	visual system homeobox 2-like	Locus_72429	3.6541	12.5891	2.03483e-19	PF00046:Homeobox; PF03826:OAR	GO:0005634:C:nucleus; GO:0043565:F:sequence-specific DNA binding; GO:0003700:F:sequence-specific DNA binding transcription factor activity; GO:0007275:P:multicellular organismal development
K7E2C9	LOC103101858	uncharacterized LOC103101858	Locus_62517	2.61991	6.14714	0.0322758	PF12937:F-box-like; PF13516:LRR_6	NO Gene Ontology
H9GN26	LOC103279894	IgGFc-binding protein-like	Locus_20495	3.37345	10.3636	3.72279e-25	PF08742:C8; PF01826:TIL; PF12714:TILa; PF00094:VWD	NO Gene Ontology
H2M8K7	LOC105356763	uncharacterized LOC105356763	Locus_130753	4.82482	28.341	1.29321e-05	NO PFAM	NO Gene Ontology
I3J9J6	LOC106098464	uncharacterized LOC106098464	Locus_33319	2.23147	4.69613	6.84608e-07	NO PFAM	NO Gene Ontology
E1C6B4	LOC107049311	serine/threonine-protein kinase NIM1-like	Locus_29263	1.5773	2.98411	0.00366337	PF00069:Pkinase	GO:0005524:F:ATP binding; GO:0000287:F:magnesium ion binding; GO:0004674:F:protein serine/threonine kinase activity
H3BCJ5	LRMP	lymphoid restricted membrane protein	Locus_21844	1.8656	3.64419	0.000115864	PF05781:MRVI1	GO:0016021:C:integral component of membrane
F1NTY3	LRRC4C	leucine rich repeat containing 4C	Locus_68658	2.92646	7.6024	1.47112e-10	PF07679:I-set; PF00560:LRR_1; PF13306:LRR_5	GO:0016021:C:integral to membrane; GO:0050770:P:regulation of axonogenesis
F7E459	MADD	MAP kinase activating death domain	Locus_2623	1.36353	2.57314	0.00270357	PF03455:dDENN; PF02141:DENN; PF03456:uDENN	GO:0016021:C:integral to membrane; GO:0005886:C:plasma membrane; GO:0017112:F:Rab guanyl-nucleotide exchange factor activity; GO:0000187:P:activation of MAPK activity; GO:0042981:P:regulation of apoptotic process; GO:0051726:P:regulation of cell cycle
Q4U1U2	MAFA	MAF bZIP transcription factor A	Locus_2164	1.37101	2.58652	0.00110562	PF03131:bZIP_Maf; PF08383:Maf_N	GO:0005634:C:nucleus; GO:0043565:F:sequence-specific DNA binding; GO:0003700:F:sequence-specific DNA binding transcription factor activity; GO:0006351:P:transcription, DNA-dependent
F1Q7D6	mag	myelin associated glycoprotein	Locus_21245	2.19155	4.56798	1.41812e-06	PF08205:C2-set_2; PF07679:I-set; PF07686:V-set	GO:0016021:C:integral to membrane
I3JVQ2	MANEAL	mannosidase endo-alpha like	Locus_76178	3.25524	9.54824	6.82693e-08	PF16317:Glyco_hydro_99	GO:0016798:F:hydrolase activity, acting on glycosyl bonds
F6Y370	MAP2	microtubule associated protein 2	Locus_9117	1.15105	2.22075	0.0718388	PF00418:Tubulin-binding	GO:0005874:C:microtubule
G3WN90	MAP2K3	mitogen-activated protein kinase kinase 3	Locus_2478	1.19466	2.28892	0.00176303	PF00069:Pkinase	GO:0005524:F:ATP binding; GO:0004674:F:protein serine/threonine kinase activity
G3NUA0	MAP3K12	mitogen-activated protein kinase kinase kinase 12	Locus_122351	2.2703	4.82424	0.0785801	PF07714:Pkinase_Tyr	GO:0005524:F:ATP binding; GO:0004709:F:MAP kinase kinase kinase activity; GO:0000165:P:MAPK cascade; GO:0046777:P:protein autophosphorylation
G3NS81	MAP3K13	mitogen-activated protein kinase kinase kinase 13	Locus_13088	2.65124	6.28207	0.00105991	PF07714:Pkinase_Tyr	GO:0005524:F:ATP binding; GO:0004709:F:MAP kinase kinase kinase activity; GO:0000165:P:MAPK cascade; GO:0046777:P:protein autophosphorylation
H2U9C5	map4k2	mitogen-activated protein kinase kinase kinase kinase 2	Locus_39859	1.25946	2.39406	0.0486097	PF00780:CNH; PF00069:Pkinase	GO:0005524:F:ATP binding; GO:0004674:F:protein serine/threonine kinase activity; GO:0005083:F:small GTPase regulator activity
M3XK09	MARCH1	membrane associated ring-CH-type finger 1	Locus_50682	2.17344	4.51097	6.62378e-05	PF12906:RINGv	GO:0008270:F:zinc ion binding
E7F4X3	march9	membrane-associated ring-CH-type finger 9	Locus_76376	3.80753	14.0017	3.91808e-12	PF12906:RINGv	GO:0008270:F:zinc ion binding
Q6DIF3	meis3	Meis homeobox 3	Locus_115128	1.11297	2.16291	0.0757728	PF05920:Homeobox_KN	GO:0005737:C:cytoplasm; GO:0005634:C:nucleus; GO:0003677:F:DNA binding; GO:0043565:F:sequence-specific DNA binding; GO:0003700:F:sequence-specific DNA binding transcription factor activity; GO:0009952:P:anterior/posterior pattern specification; GO:0030154:P:cell differentiation; GO:0031017:P:exocrine pancreas development; GO:0030902:P:hindbrain development; GO:0043410:P:positive regulation of MAP…
G1MXI7	MMD2	monocyte to macrophage differentiation associated 2	Locus_21042	1.42395	2.68319	0.00540661	PF03006:HlyIII	GO:0016021:C:integral to membrane; GO:0019835:P:cytolysis
E7F1N5	mmp25	matrix metallopeptidase 25	Locus_128191	1.69315	3.23362	0.0130956	PF00045:Hemopexin; PF00413:Peptidase_M10; PF01471:PG_binding_1	GO:0031012:C:extracellular matrix; GO:0005509:F:calcium ion binding; GO:0004222:F:metalloendopeptidase activity; GO:0008270:F:zinc ion binding; GO:0006508:P:proteolysis
Q08CS6	moxd2	monooxygenase, DBH-like 2	Locus_73534	4.73048	26.547	1.35498e-25	PF01082:Cu2_monooxygen; PF03351:DOMON	GO:0016021:C:integral to membrane; GO:0005507:F:copper ion binding; GO:0004500:F:dopamine beta-monooxygenase activity; GO:0006584:P:catecholamine metabolic process
Q5ZK82	MPPE1	metallophosphoesterase 1	Locus_16400	2.21072	4.62908	0.0272441	PF00149:Metallophos	GO:0005801:C:cis-Golgi network; GO:0070971:C:endoplasmic reticulum exit site; GO:0005793:C:endoplasmic reticulum-Golgi intermediate compartment; GO:0033116:C:endoplasmic reticulum-Golgi intermediate compartment membrane; GO:0005794:C:Golgi apparatus; GO:0016021:C:integral to membrane; GO:0034235:F:GPI anchor binding; GO:0030145:F:manganese ion binding; GO:0008081:F:phosphoric diester hydrolase ac…
I3KD15	Mpz	myelin protein zero	Locus_31524	2.78004	6.86874	1.21503e-11	PF07686:V-set	GO:0016020:C:membrane; GO:0043209:C:myelin sheath
O02826	MSMB	microseminoprotein beta	Locus_11570	2.8104	7.01479	2.33385e-05	PF05825:PSP94	GO:0005576:C:extracellular region
F6V355	MUC1	mucin 1, cell surface associated	Locus_53606	4.12455	17.4427	7.47456e-21	PF01390:SEA	GO:0016324:C:apical plasma membrane; GO:0009986:C:cell surface
G1NBA6	MYOM1	myomesin 1	Locus_3524	2.16178	4.47467	0.0351699	PF00041:fn3; PF07679:I-set	GO:0031430:C:M band; GO:0006936:P:muscle contraction
E1C8P0	MYT1	myelin transcription factor 1	Locus_59661	2.61044	6.10692	0.000183971	PF08474:MYT1; PF01530:zf-C2HC	GO:0005634:C:nucleus; GO:0003700:F:sequence-specific DNA binding transcription factor activity; GO:0008270:F:zinc ion binding
E1C4E5	n/a	uncharacterized	Locus_8337	1.52989	2.88764	0.000807698	PF00083:Sugar_tr	GO:0016021:C:integral to membrane; GO:0022891:F:substrate-specific transmembrane transporter activity
E7EYP6	n/a	uncharacterized	Locus_37785	3.02633	8.14736	2.25086e-15	NO PFAM	GO:0016021:C:integral component of membrane
E7F1U5	n/a	uncharacterized	Locus_48415	3.20922	9.24853	0.0521466	PF00078:RVT_1	GO:0016787:F:hydrolase activity; GO:0003723:F:RNA binding; GO:0003964:F:RNA-directed DNA polymerase activity; GO:0006278:P:RNA-dependent DNA replication
F1NT61	n/a	uncharacterized	Locus_13669	2.22994	4.69113	2.91231e-06	PF12799:LRR_4	GO:0003725:F:double-stranded RNA binding; GO:0098542:P:defense response to other organism; GO:0002224:P:toll-like receptor signaling pathway
F6S0I0	n/a	uncharacterized	Locus_32695	2.23223	4.69861	3.69211e-09	NO PFAM	NO Gene Ontology
F6XIE1	n/a	uncharacterized	Locus_41094	1.83997	3.58003	0.000157556	PF03091:CutA1	GO:0010038:P:response to metal ion
F7AJZ7	n/a	uncharacterized	Locus_59333	2.82374	7.07997	8.71473e-13	PF00045:Hemopexin; PF00413:Peptidase_M10; PF01471:PG_binding_1	GO:0031012:C:extracellular matrix; GO:0004222:F:metalloendopeptidase activity; GO:0008270:F:zinc ion binding; GO:0006508:P:proteolysis
F7B1H8	n/a	uncharacterized	Locus_11322	4.79001	27.6654	0.0751282	NO PFAM	NO Gene Ontology
G1KTE6	n/a	uncharacterized	Locus_26999	2.07121	4.2024	7.27659e-09	PF15192:TMEM213	GO:0016021:C:integral component of membrane
G1KTW4	n/a	uncharacterized	Locus_34283	1.97809	3.93972	0.000399118	PF00530:SRCR	GO:0016020:C:membrane; GO:0005044:F:scavenger receptor activity
G1KVP8	n/a	uncharacterized	Locus_26002	4.32119	19.9898	0.0484579	NO PFAM	GO:0003676:F:nucleic acid binding
G1L6C0	n/a	uncharacterized	Locus_20071	1.72771	3.31202	0.0206858	PF15780:ASH; PF17213:Hydin_ADK	GO:0003341:P:cilium movement
G1MYI1	n/a	uncharacterized	Locus_25558	2.26135	4.79439	1.74783e-05	NO PFAM	NO Gene Ontology
G1NKL2	n/a	uncharacterized	Locus_36818	3.46237	11.0224	6.17339e-07	PF13903:Claudin_2	GO:0016021:C:integral component of membrane
G1Q1K5	n/a	uncharacterized	Locus_2857	3.38894	10.4755	0.000249748	NO PFAM	NO Gene Ontology
G3NKM1	n/a	sulfotransferase	Locus_27230	1.44689	2.72619	0.00104755	PF00685:Sulfotransfer_1	GO:0008146:F:sulfotransferase activity
G3NLG6	n/a	uncharacterized	Locus_14791	1.89316	3.71449	6.38245e-06	PF01437:PSI; PF01403:Sema	GO:0016020:C:membrane; GO:0004872:F:receptor activity; GO:0007275:P:multicellular organismal development
G3NRD3	n/a	choline dehydrogenase	Locus_20829	1.04889	2.06893	0.0339665	PF05199:GMC_oxred_C; PF00732:GMC_oxred_N	GO:0008812:F:choline dehydrogenase activity; GO:0050660:F:flavin adenine dinucleotide binding; GO:0019285:P:glycine betaine biosynthetic process from choline
G3NS79	n/a	uncharacterized	Locus_14902	1.74548	3.35305	0.000251687	PF03098:An_peroxidase; PF13499:EF_hand_5; PF08022:FAD_binding_8; PF01794:Ferric_reduct; PF08030:NAD_binding_6	GO:0016021:C:integral to membrane; GO:0005509:F:calcium ion binding; GO:0020037:F:heme binding; GO:0004601:F:peroxidase activity; GO:0006979:P:response to oxidative stress
G3NTC7	n/a	uncharacterized	Locus_27381	2.64612	6.2598	6.71803e-11	PF00001:7tm_1	GO:0016021:C:integral to membrane; GO:0004930:F:G-protein coupled receptor activity
G3NUH5	n/a	uncharacterized	Locus_2162	1.32881	2.51195	0.0169199	PF03736:EPTP	GO:0003824:F:catalytic activity
G3NUY5	n/a	uncharacterized	Locus_21490	3.77294	13.67	1.887e-25	PF01607:CBM_14	GO:0005576:C:extracellular region; GO:0008061:F:chitin binding; GO:0006030:P:chitin metabolic process
G3P0Z6	n/a	uncharacterized	Locus_27688	1.35932	2.56564	0.000486184	PF00041:fn3; PF07679:I-set; PF00069:Pkinase	GO:0005524:F:ATP binding; GO:0004674:F:protein serine/threonine kinase activity
G3P8A5	n/a	uncharacterized	Locus_68694	2.55239	5.86606	0.0201467	NO PFAM	NO Gene Ontology
G3PAY1	n/a	uncharacterized	Locus_111072	3.06094	8.34519	4.152e-12	PF05920:Homeobox_KN	GO:0005634:C:nucleus; GO:0043565:F:sequence-specific DNA binding; GO:0003700:F:sequence-specific DNA binding transcription factor activity
G3PDL3	n/a	uncharacterized	Locus_41462	2.3546	5.11452	0.000450808	PF02263:GBP; PF02841:GBP_C	GO:0005525:F:GTP binding; GO:0003924:F:GTPase activity; GO:0006184:P:GTP catabolic process
G3PDU8	n/a	uncharacterized	Locus_105258	1.95432	3.87534	2.08793e-07	NO PFAM	GO:0016021:C:integral to membrane; GO:0015171:F:amino acid transmembrane transporter activity
G3PKT9	n/a	uncharacterized	Locus_33224	1.33394	2.52091	0.00767751	PF00041:fn3; PF06328:Lep_receptor_Ig	GO:0016021:C:integral component of membrane
G3PWX1	n/a	uncharacterized	Locus_11499	1.72927	3.3156	6.90996e-06	PF12234:Rav1p_C; PF00400:WD40	NO Gene Ontology
G3PXH1	n/a	uncharacterized	Locus_27845	1.74452	3.35083	0.00596421	PF04666:Glyco_transf_54	GO:0016020:C:membrane; GO:0016758:F:transferase activity, transferring hexosyl groups; GO:0005975:P:carbohydrate metabolic process
G3PYA3	n/a	uncharacterized	Locus_9123	1.00159	2.0022	0.081481	PF00595:PDZ	GO:0008270:F:zinc ion binding
G3PZ75	n/a	uncharacterized	Locus_12855	1.79779	3.47687	0.001749	PF00046:Homeobox; PF00412:LIM	GO:0005634:C:nucleus; GO:0043565:F:sequence-specific DNA binding; GO:0003700:F:sequence-specific DNA binding transcription factor activity; GO:0008270:F:zinc ion binding
G3Q2T0	n/a	uncharacterized	Locus_36823	1.63147	3.09829	0.0788405	PF01275:Myelin_PLP	GO:0016021:C:integral to membrane
G3Q808	n/a	uncharacterized	Locus_79632	2.81224	7.02375	5.8346e-11	PF12799:LRR_4; PF01462:LRRNT	GO:0016021:C:integral component of membrane
G3QBH0	n/a	uncharacterized	Locus_47897	3.06819	8.38719	6.57027e-19	PF00782:DSPc; PF00520:Ion_trans; PF10409:PTEN_C2	GO:0016020:C:membrane; GO:0005216:F:ion channel activity; GO:0004725:F:protein tyrosine phosphatase activity; GO:0008138:F:protein tyrosine/serine/threonine phosphatase activity; GO:0035335:P:peptidyl-tyrosine dephosphorylation
G3T7C1	n/a	uncharacterized	Locus_8488	2.21402	4.63965	0.000227311	PF15257:DUF4590	NO Gene Ontology
H0YVV9	n/a	uncharacterized	Locus_13298	1.14788	2.21587	0.0162521	PF15350:ETAA1	NO Gene Ontology
H0Z6C2	n/a	uncharacterized	Locus_10567	1.19354	2.28713	0.0302725	PF00676:E1_dh; PF02779:Transket_pyr	GO:0004591:F:oxoglutarate dehydrogenase (succinyl-transferring) activity; GO:0030976:F:thiamine pyrophosphate binding; GO:0006099:P:tricarboxylic acid cycle
H0ZH16	n/a	uncharacterized	Locus_8953	1.81455	3.51749	2.16581e-05	PF06119:NIDO; PF00094:VWD	GO:0007160:P:cell-matrix adhesion
H2LJE1	n/a	uncharacterized	Locus_122683	3.04611	8.25981	0.000631257	NO PFAM	NO Gene Ontology
H2MDR5	n/a	uncharacterized	Locus_41586	3.39371	10.5101	1.68067e-13	PF01498:HTH_Tnp_Tc3_2	GO:0003677:F:DNA binding; GO:0004803:F:transposase activity; GO:0015074:P:DNA integration; GO:0006313:P:transposition, DNA-mediated
H2MDV7	n/a	uncharacterized	Locus_29839	3.09884	8.56732	6.5409e-06	PF13855:LRR_8	GO:0016021:C:integral component of membrane
H2MKA3	n/a	uncharacterized	Locus_3098	1.95904	3.88803	1.19791e-07	PF00907:T-box	GO:0005634:C:nucleus; GO:0003677:F:DNA binding; GO:0003700:F:sequence-specific DNA binding transcription factor activity; GO:0006351:P:transcription, DNA-dependent
H2MRP8	n/a	uncharacterized	Locus_115213	3.03148	8.17646	1.06023e-11	PF01344:Kelch_1	NO Gene Ontology
H2R189	n/a	uncharacterized	Locus_15275	4.18373	18.1731	1.66134e-25	PF00501:AMP-binding	GO:0003824:F:catalytic activity
H2RAC5	n/a	uncharacterized	Locus_70115	2.06964	4.19782	0.0375604	PF00017:SH2	NO Gene Ontology
H2S0F5	n/a	uncharacterized	Locus_72741	2.6428	6.24544	0.00171285	PF00001:7tm_1	GO:0016021:C:integral to membrane; GO:0004930:F:G-protein coupled receptor activity
H2TCI7	n/a	uncharacterized	Locus_6451	2.63679	6.21947	9.92043e-09	PF07534:TLD	NO Gene Ontology
H2TTA8	n/a	uncharacterized	Locus_15239	1.16806	2.24709	0.0563598	PF03372:Exo_endo_phos	GO:0046856:P:phosphatidylinositol dephosphorylation
H2U5J3	n/a	uncharacterized	Locus_55778	3.07253	8.41246	3.19663e-07	PF03467:Smg4_UPF3	GO:0000166:F:nucleotide binding
H2U6V7	n/a	uncharacterized	Locus_5717	3.51707	11.4484	1.54115e-23	PF00595:PDZ; PF00640:PID	GO:0001540:F:beta-amyloid binding; GO:0007268:P:chemical synaptic transmission; GO:0006461:P:protein complex assembly; GO:0008021:C:synaptic vesicle
H2Y5Q9	n/a	uncharacterized	Locus_13124	4.04641	16.5231	4.63008e-10	PF12947:EGF_3; PF07645:EGF_CA	GO:0005578:C:proteinaceous extracellular matrix; GO:0005509:F:calcium ion binding; GO:0005201:F:extracellular matrix structural constituent
H2YQ58	n/a	uncharacterized	Locus_105881	5.24357	37.8853	0.0692422	PF05699:Dimer_Tnp_hAT	GO:0003676:F:nucleic acid binding
H2YV24	n/a	uncharacterized	Locus_135600	4.97547	31.4605	0.000484316	PF00168:C2	NO Gene Ontology
H2Z397	n/a	uncharacterized	Locus_56633	1.96964	3.91669	0.020781	PF05699:Dimer_Tnp_hAT	GO:0003676:F:nucleic acid binding
H2ZUJ0	n/a	uncharacterized	Locus_62760	3.40688	10.6065	7.79479e-09	PF09068:efhand_1; PF09069:efhand_2; PF00569:ZZ	GO:0005509:F:calcium ion binding; GO:0008270:F:zinc ion binding
H3AGQ8	n/a	uncharacterized	Locus_132548	4.82324	28.31	9.54614e-06	NO PFAM	NO Gene Ontology
H3AJA2	n/a	uncharacterized	Locus_46078	3.21554	9.28908	5.41329e-16	PF07646:Kelch_2	NO Gene Ontology
H3ANC8	n/a	uncharacterized	Locus_26188	2.8629	7.27476	0.000633628	PF00250:Fork_head	GO:0005634:C:nucleus; GO:0043565:F:sequence-specific DNA binding; GO:0003700:F:sequence-specific DNA binding transcription factor activity; GO:0006351:P:transcription, DNA-dependent
H3APL3	n/a	uncharacterized	Locus_61128	2.16576	4.48703	0.00044765	PF00917:MATH	GO:0004842:F:ubiquitin-protein ligase activity; GO:0008270:F:zinc ion binding
H3AUU0	n/a	uncharacterized	Locus_22888	1.33487	2.52254	0.00444088	PF15257:DUF4590	NO Gene Ontology
H3B1M5	n/a	uncharacterized	Locus_35241	4.56841	23.7263	1.88985e-31	PF00027:cNMP_binding; PF00520:Ion_trans; PF08412:Ion_trans_N	GO:0016021:C:integral to membrane; GO:0005249:F:voltage-gated potassium channel activity
H3B3W9	n/a	uncharacterized	Locus_86645	Inf	Inf	5.3802e-05	PF00041:fn3	NO Gene Ontology
H3B449	n/a	uncharacterized	Locus_112064	2.00929	4.02584	0.000466046	PF00340:IL1	GO:0005615:C:extracellular space
H3BAN8	n/a	uncharacterized	Locus_76307	4.65429	25.1815	2.18189e-36	PF15683:TDRP	GO:0007283:P:spermatogenesis
H3BBE0	n/a	uncharacterized	Locus_76132	4.83711	28.5835	1.18571e-06	PF00230:MIP	GO:0016021:C:integral to membrane; GO:0005215:F:transporter activity
H3BHS9	n/a	uncharacterized	Locus_42911	4.71547	26.2722	6.02813e-39	PF00100:Zona_pellucida	NO Gene Ontology
H3BHV3	n/a	uncharacterized	Locus_14380	1.43125	2.6968	0.000186951	NO PFAM	GO:0016021:C:integral component of membrane
H3BX97	n/a	uncharacterized	Locus_20330	4.43636	21.6509	8.03913e-35	NO PFAM	NO Gene Ontology
H3C3F4	n/a	uncharacterized	Locus_8749	3.48282	11.1798	7.13845e-09	PF02181:FH2	GO:0030036:P:actin cytoskeleton organization
H3CAW9	n/a	uncharacterized	Locus_36288	1.93174	3.81514	3.47731e-06	PF00080:Sod_Cu	GO:0046872:F:metal ion binding; GO:0055114:P:oxidation-reduction process; GO:0006801:P:superoxide metabolic process
H3CI32	n/a	transmembrane channel-like protein	Locus_55992	3.61439	12.2472	5.01321e-06	PF07810:TMC	GO:0016021:C:integral to membrane
H3CR10	n/a	uncharacterized	Locus_28778	2.16978	4.49953	6.27372e-08	PF00610:DEP; PF00631:G-gamma; PF00615:RGS	GO:0005834:C:heterotrimeric G-protein complex; GO:0004871:F:signal transducer activity; GO:0007186:P:G-protein coupled receptor signaling pathway; GO:0035556:P:intracellular signal transduction; GO:0038032:P:termination of G-protein coupled receptor signaling pathway
H3CVL1	n/a	uncharacterized	Locus_36939	1.95956	3.88942	1.51074e-08	PF00028:Cadherin	GO:0016021:C:integral to membrane; GO:0005886:C:plasma membrane; GO:0005509:F:calcium ion binding; GO:0007156:P:homophilic cell adhesion
H3CYA9	n/a	claudin	Locus_36317	2.32711	5.018	0.000171846	PF00822:PMP22_Claudin	GO:0016021:C:integral to membrane; GO:0005886:C:plasma membrane; GO:0005923:C:tight junction; GO:0005198:F:structural molecule activity
H3CZV7	n/a	uncharacterized	Locus_9531	1.6636	3.16807	1.44074e-05	PF05622:HOOK	GO:0005737:C:cytoplasm; GO:0000226:P:microtubule cytoskeleton organization
H9G836	n/a	uncharacterized	Locus_28306	3.69016	12.9077	0.000178399	PF00595:PDZ	GO:0021694:P:cerebellar Purkinje cell layer formation; GO:0045184:P:establishment of protein localization; GO:0060122:P:inner ear receptor stereocilium organization; GO:1990227:P:paranodal junction maintenance; GO:0010628:P:positive regulation of gene expression; GO:0050953:P:sensory perception of light stimulus; GO:0007605:P:sensory perception of sound; GO:0005884:C:actin filament; GO:0036064:C:…
H9GPQ1	n/a	uncharacterized	Locus_128510	4.09107	17.0426	1.31625e-11	PF04103:CD20	GO:0016021:C:integral to membrane
I3IVV9	n/a	uncharacterized	Locus_26264	2.26634	4.811	5.02087e-07	PF07527:Hairy_orange; PF00010:HLH	GO:0005634:C:nucleus; GO:0003677:F:DNA binding; GO:0006355:P:regulation of transcription, DNA-dependent; GO:0006351:P:transcription, DNA-dependent
I3IWS3	n/a	uncharacterized	Locus_25786	2.46743	5.53056	3.4609e-12	PF01390:SEA	GO:0007043:P:cell-cell junction assembly; GO:0007507:P:heart development; GO:0016021;integral component of membrane
I3JZM2	n/a	uncharacterized	Locus_76084	5.38901	41.9039	9.31247e-10	PF00001:7tm_1	GO:0016021:C:integral to membrane; GO:0004930:F:G-protein coupled receptor activity
I3K7C2	n/a	uncharacterized	Locus_12113	1.79335	3.46619	0.000311959	NO PFAM	NO Gene Ontology
I3KJJ8	n/a	uncharacterized	Locus_62607	2.47158	5.54653	1.14547e-09	PF08238:Sel1	NO Gene Ontology
I3KY05	n/a	uncharacterized	Locus_3494	1.08106	2.11559	0.0133233	PF00992:Troponin	GO:0005861:C:troponin complex
I3LTV7	n/a	tyrosine-protein kinase receptor	Locus_10070	1.9623	3.89682	1.84828e-05	PF07714:Pkinase_Tyr	GO:0016021:C:integral to membrane; GO:0005524:F:ATP binding; GO:0004714:F:transmembrane receptor protein tyrosine kinase activity; GO:0007169:P:transmembrane receptor protein tyrosine kinase signaling pathway
I3N751	n/a	uncharacterized	Locus_22406	2.33951	5.06131	1.37922e-10	PF00400:WD40	NO Gene Ontology
K9J7L3	n/a	uncharacterized	Locus_15261	2.39762	5.26933	2.23646e-09	NO PFAM	GO:0051017:P:actin filament bundle assembly
Q6ZQT0	n/a	putative uncharacterized protein FLJ45035	Locus_23526	2.31094	4.96206	0.000107986	NO PFAM	NO Gene Ontology
F1QBW0	ncf2	neutrophil cytosolic factor 2	Locus_28310	2.107	4.30794	1.3189e-06	PF00018:SH3_1; PF13181:TPR_8	NO Gene Ontology
F7I7J2	NEK11	NIMA related kinase 11	Locus_45842	2.41975	5.35078	3.38082e-08	PF00069:Pkinase	GO:0005524:F:ATP binding; GO:0004674:F:protein serine/threonine kinase activity
G1KDA9	NEURL1	neuralized E3 ubiquitin protein ligase 1	Locus_4591	1.86604	3.6453	1.19627e-05	PF07177:Neuralized	GO:0005737:C:cytoplasm; GO:0005886:C:plasma membrane; GO:0008270:F:zinc ion binding; GO:0007595:P:lactation; GO:0009605:P:response to external stimulus; GO:0007288:P:sperm axoneme assembly; GO:0030317:P:sperm motility
I3NDA3	NEUROD4	neuronal differentiation 4	Locus_63207	4.24128	18.9127	1.04977e-22	PF00010:HLH; PF12533:Neuro_bHLH	GO:0005634:C:nucleus; GO:0003677:F:DNA binding; GO:0030154:P:cell differentiation; GO:0007399:P:nervous system development; GO:0006355:P:regulation of transcription, DNA-dependent; GO:0006351:P:transcription, DNA-dependent
H3AZ48	NKX2-3	NK2 homeobox 3	Locus_101969	2.36481	5.15086	5.37516e-08	PF00046:Homeobox	GO:0005634:C:nucleus; GO:0043565:F:sequence-specific DNA binding; GO:0003700:F:sequence-specific DNA binding transcription factor activity
H3AXY2	NKX3-1	NK3 homeobox 1	Locus_36253	2.53339	5.7893	1.20551e-07	PF00046:Homeobox	GO:0005634:C:nucleus; GO:0043565:F:sequence-specific DNA binding; GO:0003700:F:sequence-specific DNA binding transcription factor activity
Q5H8A3	NMS	neuromedin S	Locus_36959	2.56756	5.92808	0.00487925	PF02070:NMU	GO:0005576:C:extracellular region; GO:0007218:P:neuropeptide signaling pathway; GO:0006940:P:regulation of smooth muscle contraction
H2L7D0	nox1	NADPH oxidase 1	Locus_11783	1.13926	2.20268	0.0641396	PF08022:FAD_binding_8; PF01794:Ferric_reduct; PF08030:NAD_binding_6	GO:0016021:C:integral to membrane; GO:0016491:F:oxidoreductase activity
H2ZV33	NOXO1	NADPH oxidase organizer 1	Locus_41058	1.65804	3.15589	0.000563841	PF00787:PX; PF07653:SH3_2	GO:0035091:F:phosphatidylinositol binding; GO:0007154:P:cell communication
H0ZDA5	NRIP3	nuclear receptor interacting protein 3	Locus_108730	1.31479	2.48766	0.0114754	PF09668:Asp_protease	GO:0004190:F:aspartic-type endopeptidase activity; GO:0006508:P:proteolysis
A1XQY0	nrxn3	neurexin 3	Locus_11473	1.62971	3.09451	0.000402768	PF02210:Laminin_G_2	GO:0016021:C:integral to membrane; GO:0001525:P:angiogenesis; GO:0007155:P:cell adhesion
F1NC86	NTS	neurotensin	Locus_13798	4.27612	19.375	3.67097e-07	PF07421:Pro-NT_NN	GO:0005576:C:extracellular region
H3AAD3	OSR1	odd-skipped related transciption factor 1	Locus_23481	2.12031	4.34787	1.61325e-09	NO PFAM	GO:0003676:F:nucleic acid binding; GO:0008270:F:zinc ion binding
H3BBC4	OSTN	osteocrin	Locus_32091	1.75917	3.38503	0.000116143	PF11037:Musclin	NO Gene Ontology
H3BC75	OTOF	otoferlin	Locus_78207	4.38393	20.8782	7.98881e-05	PF00168:C2; PF08150:FerB; PF08151:FerI	GO:0016021:C:integral to membrane
Q91994	otx1	orthodenticle homeobox 1	Locus_72504	4.22652	18.7202	8.21436e-24	PF00046:Homeobox; PF03529:TF_Otx	GO:0005634:C:nucleus; GO:0043565:F:sequence-specific DNA binding; GO:0003700:F:sequence-specific DNA binding transcription factor activity; GO:0042472:P:inner ear morphogenesis; GO:0003406:P:retinal pigment epithelium development
F1N8W8	PAK3	p21 (RAC1) activated kinase 3	Locus_6773	1.72154	3.29788	1.11919e-05	PF00786:PBD; PF00069:Pkinase	GO:0005524:F:ATP binding; GO:0004708:F:MAP kinase kinase activity; GO:0004674:F:protein serine/threonine kinase activity; GO:0007409:P:axonogenesis; GO:0016358:P:dendrite development; GO:0030833:P:regulation of actin filament polymerization
E7F7V4	panx3	pannexin 3	Locus_17325	1.94275	3.84439	0.000462455	PF00876:Innexin	GO:0005921:C:gap junction; GO:0005622:C:intracellular
Q801G2	paqr7	progestin and adipoQ receptor family member 7	Locus_33879	1.53686	2.90163	0.00366352	PF03006:HlyIII	GO:0016021:C:integral to membrane; GO:0005886:C:plasma membrane; GO:0005496:F:steroid binding; GO:0003707:F:steroid hormone receptor activity; GO:0000187:P:activation of MAPK activity; GO:0007275:P:multicellular organismal development; GO:0007194:P:negative regulation of adenylate cyclase activity; GO:0001556:P:oocyte maturation
H2T117	PCBP4	poly(rC) binding protein 4	Locus_8526	1.53143	2.89072	0.000269514	PF00013:KH_1	GO:0003723:F:RNA binding
E9PE96	PCLO	piccolo presynaptic cytomatrix protein	Locus_62589	2.2267	4.68062	0.000291927	NO PFAM	GO:0007416:P:synapse assembly; GO:0016021:C:integral component of membrane; GO:0048786:C:presynaptic active zone
F1QP81	pcp4	Purkinje cell protein 4	Locus_29647	3.72595	13.2319	8.84973e-06	NO PFAM	NO Gene Ontology
F7GJD7	PCSK9	proprotein convertase subtilisin/kexin type 9	Locus_83051	1.07619	2.10845	0.08049	PF05922:Inhibitor_I9; PF00082:Peptidase_S8	GO:0009986:C:cell surface; GO:0005769:C:early endosome; GO:0005783:C:endoplasmic reticulum; GO:0005615:C:extracellular space; GO:0005794:C:Golgi apparatus; GO:0005770:C:late endosome; GO:0005764:C:lysosome; GO:0048471:C:perinuclear region of cytoplasm; GO:0030169:F:low-density lipoprotein particle binding; GO:0004252:F:serine-type endopeptidase activity; GO:0019871:F:sodium channel inhibitor acti…
Q6PCE3	PGM2L1	phosphoglucomutase 2 like 1	Locus_20799	3.26142	9.58924	4.24798e-05	PF02878:PGM_PMM_I; PF02879:PGM_PMM_II; PF02880:PGM_PMM_III; PF00408:PGM_PMM_IV	GO:0005829:C:cytosol; GO:0047933:F:glucose-1,6-bisphosphate synthase activity; GO:0004614:F:phosphoglucomutase activity; GO:0016052:P:carbohydrate catabolic process; GO:0006006:P:glucose metabolic process
H3AJU6	PHOSPHO1	phosphoethanolamine/phosphocholine phosphatase	Locus_91218	1.32464	2.5047	0.0089202	PF06888:Put_Phosphatase	GO:0016791:F:phosphatase activity; GO:0016311:P:dephosphorylation
H2Q1X8	PHYHIPL	phytanoyl-CoA 2-hydroxylase interacting protein like	Locus_9007	1.99493	3.98597	1.19971e-06	PF00041:fn3	GO:0005739:C:mitochondrion
F6PNS3	PIP5K1B	phosphatidylinositol-4-phosphate 5-kinase type 1 beta	Locus_11805	1.36391	2.57382	0.00874167	PF01504:PIP5K	GO:0001931:C:uropod; GO:0016308:F:1-phosphatidylinositol-4-phosphate 5-kinase activity; GO:0046854:P:phosphatidylinositol phosphorylation
F1QA92	pip5kl1	phosphatidylinositol-4-phosphate 5-kinase like 1	Locus_41392	3.46619	11.0516	3.91772e-13	PF01504:PIP5K	GO:0016307:F:phosphatidylinositol phosphate kinase activity; GO:0046854:P:phosphatidylinositol phosphorylation
H2TEA3	pitx1	paired like homeodomain 1	Locus_20245	1.65391	3.14685	0.000531907	PF00046:Homeobox; PF03826:OAR	GO:0005634:C:nucleus; GO:0043565:F:sequence-specific DNA binding; GO:0003700:F:sequence-specific DNA binding transcription factor activity; GO:0007275:P:multicellular organismal development
G1Q2W2	PKHD1L1	polycystic kidney and hepatic disease 1 (autosomal recessive)-like 1	Locus_58884	2.09931	4.28505	4.15357e-05	PF10162:G8; PF07691:PA14; PF01833:TIG	NO Gene Ontology
Q5SPN9	pkib	protein kinase (cAMP-dependent, catalytic) inhibitor beta	Locus_47046	1.44738	2.72713	0.0317526	PF02827:PKI	GO:0004862:F:cAMP-dependent protein kinase inhibitor activity
H2TTV8	plscr3	phospholipid scramblase 3	Locus_981	1.41883	2.67369	0.000450808	PF03803:Scramblase	NO Gene Ontology
Q90482	pou3f1	POU class 3 homeobox 1	Locus_8368	1.41738	2.67101	0.020611	PF00046:Homeobox; PF00157:Pou	GO:0005634:C:nucleus; GO:0043565:F:sequence-specific DNA binding; GO:0003700:F:sequence-specific DNA binding transcription factor activity; GO:0030154:P:cell differentiation; GO:0007399:P:nervous system development; GO:0006351:P:transcription, DNA-dependent
P62515	Pou3f4	POU class 3 homeobox 4	Locus_65323	3.67456	12.7689	9.73899e-20	PF00046:Homeobox; PF00157:Pou	GO:0005622:C:intracellular; GO:0005634:C:nucleus; GO:0003680:F:AT DNA binding; GO:0003690:F:double-stranded DNA binding; GO:0043565:F:sequence-specific DNA binding; GO:0003700:F:sequence-specific DNA binding transcription factor activity; GO:0090103:P:cochlea morphogenesis; GO:0021879:P:forebrain neuron differentiation; GO:2001054:P:negative regulation of mesenchymal cell apoptotic process; GO:00…
A4IGJ4	pou4f1	POU class 4 homeobox 1	Locus_62301	4.36603	20.6209	2.03037e-29	PF00046:Homeobox; PF00157:Pou	GO:0016020:C:membrane; GO:0005634:C:nucleus; GO:0043565:F:sequence-specific DNA binding; GO:0003700:F:sequence-specific DNA binding transcription factor activity; GO:0005215:F:transporter activity
G3W1P6	POU4F3	POU class 4 homeobox 3	Locus_31937	4.77937	27.462	5.73949e-31	PF00046:Homeobox; PF00157:Pou	GO:0005634:C:nucleus; GO:0043565:F:sequence-specific DNA binding; GO:0003700:F:sequence-specific DNA binding transcription factor activity
H3ACY0	PPP1R32	protein phosphatase 1 regulatory subunit 32	Locus_41319	1.43189	2.698	0.0245319	PF15691:PPP1R32	NO Gene Ontology
Q15139	PRKD1	protein kinase D1	Locus_2118	1.26212	2.39848	0.0254731	PF00130:C1_1; PF00169:PH; PF00069:Pkinase	GO:0005938:C:cell cortex; GO:0005911:C:cell-cell junction; GO:0005829:C:cytosol; GO:0005794:C:Golgi apparatus; GO:0005887:C:integral to plasma membrane; GO:0005634:C:nucleus; GO:0005802:C:trans-Golgi network; GO:0005524:F:ATP binding; GO:0046872:F:metal ion binding; GO:0005543:F:phospholipid binding; GO:0004697:F:protein kinase C activity; GO:0004674:F:protein serine/threonine kinase activity; GO…
F6UUN9	prlhr	prolactin releasing hormone receptor	Locus_33441	4.05634	16.6372	2.06278e-13	PF00001:7tm_1	GO:0016021:C:integral to membrane; GO:0004983:F:neuropeptide Y receptor activity
E7F6W0	proca1	protein interacting with cyclin A1	Locus_37462	4.88353	29.5182	0.0159365	PF05826:Phospholip_A2_2	GO:0005576:C:extracellular region; GO:0005509:F:calcium ion binding; GO:0004623:F:phospholipase A2 activity; GO:0016042:P:lipid catabolic process; GO:0006644:P:phospholipid metabolic process
Q7ZT36	pvalb3	parvalbumin 3 (zebrafish)	Locus_5249	1.09996	2.14348	0.00472776	PF13499:EF_hand_5	GO:0005509:F:calcium ion binding
Q5U3P2	pvalb8	parvalbumin 8 (zebrafish)	Locus_86889	4.51144	22.8076	1.09281e-36	PF13499:EF_hand_5	GO:0005509:F:calcium ion binding
F6TZ81	RAB3A	RAB3A, member RAS oncogene family	Locus_21238	3.35751	10.2497	1.65437e-13	PF00071:Ras	GO:0001669:C:acrosomal vesicle; GO:0008021:C:synaptic vesicle; GO:0005525:F:GTP binding; GO:0003924:F:GTPase activity; GO:0007409:P:axonogenesis; GO:0030324:P:lung development; GO:0048790:P:maintenance of presynaptic active zone structure; GO:0007005:P:mitochondrion organization; GO:0007274:P:neuromuscular synaptic transmission; GO:0009791:P:post-embryonic development; GO:0015031:P:protein transp…
Q6P977	rab42	RAB42, member RAS oncogene family	Locus_21018	2.03869	4.10872	4.31212e-08	PF00071:Ras	GO:0005525:F:GTP binding; GO:0015031:P:protein transport; GO:0007264:P:small GTPase mediated signal transduction
O43374	RASA4	RAS p21 protein activator 4	Locus_9365	1.07709	2.10978	0.0900899	PF00779:BTK; PF00168:C2; PF00616:RasGAP	GO:0005737:C:cytoplasm; GO:0005829:C:cytosol; GO:0031235:C:intrinsic to internal side of plasma membrane; GO:0046872:F:metal ion binding; GO:0005543:F:phospholipid binding; GO:0005099:F:Ras GTPase activator activity; GO:0035556:P:intracellular signal transduction; GO:0046580:P:negative regulation of Ras protein signal transduction
E1BQE2	RBM26	RNA binding motif protein 26	Locus_4245	4.21252	18.5394	1.96256e-32	PF01480:PWI	GO:0000166:F:nucleotide binding; GO:0003723:F:RNA binding; GO:0008270:F:zinc ion binding; GO:0006397:P:mRNA processing
H2UVS4	REM2	RRAD and GEM like GTPase 2	Locus_62023	3.78044	13.7412	7.38101e-13	PF00071:Ras	GO:0016020:C:membrane; GO:0005525:F:GTP binding; GO:0003924:F:GTPase activity; GO:0007264:P:small GTPase mediated signal transduction
F1NI15	REPS2	RALBP1 associated Eps domain containing 2	Locus_27620	1.21814	2.32647	0.0064202	NO PFAM	GO:0005509:F:calcium ion binding; GO:0006898:P:receptor-mediated endocytosis
G3UPL6	RET	ret proto-oncogene	Locus_28070	1.52819	2.88424	0.00119508	PF00028:Cadherin; PF07714:Pkinase_Tyr	GO:0016021:C:integral to membrane; GO:0005524:F:ATP binding; GO:0005509:F:calcium ion binding; GO:0004713:F:protein tyrosine kinase activity; GO:0007156:P:homophilic cell adhesion
D2H8T8	RFC3	replication factor C subunit 3	Locus_6894	1.21315	2.31843	0.002167	PF08542:Rep_fac_C	GO:0016887:F:ATPase activity; GO:0003677:F:DNA binding; GO:0000166:F:nucleotide binding; GO:0006260:P:DNA replication; GO:0046683:P:response to organophosphorus
Q9JIS1	Rims2	regulating synaptic membrane exocytosis 2	Locus_40568	3.97619	15.7381	5.40046e-17	PF00168:C2; PF00595:PDZ	GO:0030054:C:cell junction; GO:0005886:C:plasma membrane; GO:0042734:C:presynaptic membrane; GO:0046872:F:metal ion binding; GO:0017156:P:calcium ion-dependent exocytosis; GO:0048791:P:calcium ion-dependent exocytosis of neurotransmitter; GO:0019933:P:cAMP-mediated signaling; GO:0030073:P:insulin secretion; GO:0006886:P:intracellular protein transport; GO:0042391:P:regulation of membrane potential
E1C5M3	RORB	RAR related orphan receptor B	Locus_23635	2.63513	6.2123	7.51377e-09	PF00104:Hormone_recep; PF00105:zf-C4	GO:0005634:C:nucleus; GO:0004879:F:ligand-activated sequence-specific DNA binding RNA polymerase II transcription factor activity; GO:0043565:F:sequence-specific DNA binding; GO:0003707:F:steroid hormone receptor activity; GO:0008270:F:zinc ion binding; GO:0042462:P:eye photoreceptor cell development; GO:0030522:P:intracellular receptor mediated signaling pathway; GO:0045893:P:positive regulation…
H3BEA7	RORC	RAR related orphan receptor C	Locus_1975	3.83419	14.2628	7.15415e-12	PF00104:Hormone_recep; PF00105:zf-C4	GO:0005634:C:nucleus; GO:0004879:F:ligand-activated sequence-specific DNA binding RNA polymerase II transcription factor activity; GO:0043565:F:sequence-specific DNA binding; GO:0003707:F:steroid hormone receptor activity; GO:0008270:F:zinc ion binding; GO:0030522:P:intracellular receptor mediated signaling pathway
Q62193	Rpa2	replication protein A2	Locus_6744	1.04563	2.06426	0.00611513	PF08784:RPA_C	GO:0005654:C:nucleoplasm; GO:0016605:C:PML body; GO:0003677:F:DNA binding; GO:0006310:P:DNA recombination; GO:0006281:P:DNA repair; GO:0006260:P:DNA replication; GO:0010569:P:regulation of double-strand break repair via homologous recombination
G1NI96	RPS6KA2	ribosomal protein S6 kinase A2	Locus_33099	2.94842	7.71905	9.80824e-12	PF00069:Pkinase; PF00433:Pkinase_C	GO:0005737:C:cytoplasm; GO:0005634:C:nucleus; GO:0005819:C:spindle; GO:0005524:F:ATP binding; GO:0000287:F:magnesium ion binding; GO:0004711:F:ribosomal protein S6 kinase activity; GO:0002035:P:brain renin-angiotensin system; GO:0010659:P:cardiac muscle cell apoptotic process; GO:0071322:P:cellular response to carbohydrate stimulus; GO:0060047:P:heart contraction; GO:0007507:P:heart development; …
G3WMG1	RSPH10B	radial spoke head 10 homolog B2	Locus_34578	1.40103	2.6409	0.0659887	PF02493:MORN	NO Gene Ontology
E1BVU3	RSPO1	R-spondin 1	Locus_45417	1.28048	2.4292	0.00188967	NO PFAM	GO:0005615:C:extracellular space; GO:0005634:C:nucleus; GO:0008201:F:heparin binding; GO:0060070:P:canonical Wnt receptor signaling pathway; GO:0090263:P:positive regulation of canonical Wnt receptor signaling pathway; GO:0002090:P:regulation of receptor internalization
I3JN61	rtbdn	retbindin	Locus_61188	2.9275	7.60792	2.48289e-13	PF03024:Folate_rec	NO Gene Ontology
I3JC07	RTN4RL2	reticulon-4 receptor-like 2	Locus_32525	4.53196	23.1342	3.36764e-22	PF13855:LRR_8	NO Gene Ontology
E9QIL6	samd10	sterile alpha motif domain containing 10	Locus_52851	2.10228	4.29386	1.43857e-05	PF07647:SAM_2	NO Gene Ontology
H2QJ76	SATB2	SATB homeobox 2	Locus_20988	2.25954	4.78838	1.74298e-09	PF02376:CUT; PF00046:Homeobox	GO:0005634:C:nucleus; GO:0043565:F:sequence-specific DNA binding; GO:0003700:F:sequence-specific DNA binding transcription factor activity
M3XHF9	SCAMP5	secretory carrier membrane protein 5	Locus_26084	1.9858	3.96081	4.09904e-06	PF04144:SCAMP	GO:0016021:C:integral to membrane; GO:0015031:P:protein transport
H3ACJ2	SCG5	secretogranin V	Locus_122448	1.86848	3.65147	0.00065767	PF05281:Secretogranin_V	GO:0030141:C:secretory granule; GO:0007218:P:neuropeptide signaling pathway
F1NT50	SDK1	sidekick cell adhesion molecule 1	Locus_28735	1.43829	2.70999	0.0471372	PF00041:fn3	GO:0048148:P:behavioral response to cocaine; GO:0060998:P:regulation of dendritic spine development; GO:0070062:C:extracellular exosome; GO:0016021:C:integral component of membrane
G1P1V2	SFRP4	secreted frizzled related protein 4	Locus_103955	1.60597	3.04401	0.0599181	PF01392:Fz; PF01759:NTR	GO:0009986:C:cell surface; GO:0005737:C:cytoplasm; GO:0005615:C:extracellular space; GO:0005634:C:nucleus; GO:0007275:P:multicellular organismal development; GO:0090090:P:negative regulation of canonical Wnt receptor signaling pathway; GO:0008285:P:negative regulation of cell proliferation; GO:0043433:P:negative regulation of sequence-specific DNA binding transcription factor activity; GO:2000119…
G1MQE6	SH2D4B	SH2 domain containing 4B	Locus_28496	3.04443	8.25018	4.63008e-10	PF00017:SH2	NO Gene Ontology
F7DS04	SHC4	SHC adaptor protein 4	Locus_72835	3.43031	10.7802	2.43426e-15	PF00640:PID; PF00017:SH2	GO:0035556:P:intracellular signal transduction
F1NZI3	SHROOM3	shroom family member 3	Locus_8206	1.10378	2.14917	0.0995656	PF08688:ASD1; PF08687:ASD2	GO:0005912:C:adherens junction; GO:0043296:C:apical junction complex; GO:0016324:C:apical plasma membrane; GO:0005737:C:cytoplasm; GO:0005856:C:cytoskeleton; GO:0030036:P:actin cytoskeleton organization; GO:0000902:P:cell morphogenesis; GO:0002066:P:columnar/cuboidal epithelial cell development; GO:0001843:P:neural tube closure; GO:0007389:P:pattern specification process; GO:0008360:P:regulation …
A9C464	si:ch211-170d8.2	si:ch211-170d8.2	Locus_104323	3.01607	8.0896	0.00396525	NO PFAM	NO Gene Ontology
A5PMH4	si:ch211-202f5.2	si:ch211-202f5.2	Locus_37041	2.35013	5.09869	4.13866e-09	PF13639:zf-RING_2	GO:0008270:F:zinc ion binding
E7F180	si:ch211-220f21.2	uncharacterized	Locus_12978	1.68598	3.21759	4.50434e-05	PF13895:Ig_2	NO Gene Ontology
E7F3H4	si:ch73-15n15.3	uncharacterized	Locus_52792	4.88079	29.4621	1.80741e-33	PF00822:PMP22_Claudin	GO:0016021:C:integral to membrane; GO:0005886:C:plasma membrane; GO:0005923:C:tight junction; GO:0005198:F:structural molecule activity
F1QDK9	si:ch73-261i21.5	si:ch73-261i21.5	Locus_35018	4.60623	24.3565	2.56003e-35	PF00100:Zona_pellucida	GO:0016021:C:integral component of membrane
A2CEY7	si:dkey-251i10.2	si:dkey-251i10.2	Locus_59420	3.17789	9.04983	1.55305e-16	PF02014:Reeler	NO Gene Ontology
E7FCZ0	si:dkey-33m11.8	uncharacterized	Locus_113021	4.05205	16.5877	1.48005e-09	PF00089:Trypsin	GO:0004252:F:serine-type endopeptidase activity; GO:0006508:P:proteolysis
E7FGV0	si:dkeyp-97b10.3	si:dkeyp-97b10.3	Locus_8994	1.40756	2.65288	0.00215279	PF00531:Death; PF13553:FIIND	GO:0007165:P:signal transduction
G3UUN1	SIM2	single-minded family bHLH transcription factor 2	Locus_68516	2.70744	6.53161	1.05903e-08	PF00989:PAS; PF08447:PAS_3; PF06621:SIM_C	GO:0005634:C:nucleus; GO:0003677:F:DNA binding; GO:0003700:F:sequence-specific DNA binding transcription factor activity; GO:0004871:F:signal transducer activity; GO:0009880:P:embryonic pattern specification; GO:0030324:P:lung development; GO:0000122:P:negative regulation of transcription from RNA polymerase II promoter
Q6NZ04	six1	SIX homeobox 1	Locus_16102	0.988927	1.98471	0.0384877	PF00046:Homeobox	GO:0005634:C:nucleus; GO:0043565:F:sequence-specific DNA binding; GO:0003700:F:sequence-specific DNA binding transcription factor activity; GO:0021984:P:adenohypophysis development; GO:0002074:P:extraocular skeletal muscle development; GO:0048839:P:inner ear development; GO:0048935:P:peripheral nervous system neuron development; GO:0043282:P:pharyngeal muscle development; GO:0051146:P:striated mu…
Q98TH1	six2	SIX homeobox 2	Locus_13056	1.64046	3.11764	1.55898e-05	PF00046:Homeobox	GO:0005634:C:nucleus; GO:0043565:F:sequence-specific DNA binding; GO:0003700:F:sequence-specific DNA binding transcription factor activity; GO:0048793:P:pronephros development
H0V7S9	SLC13A1	solute carrier family 13 member 1	Locus_42478	2.83832	7.15187	3.7568e-06	PF00939:Na_sulph_symp	GO:0016020:C:membrane; GO:0005215:F:transporter activity; GO:0006814:P:sodium ion transport; GO:0055085:P:transmembrane transport
H2M6F9	SLC17A8	solute carrier family 17 member 8 (Vglut3)	Locus_45425	4.95124	30.9366	4.07271e-40	PF07690:MFS_1	GO:0016021:C:integral to membrane; GO:0055085:P:transmembrane transport
G1T3S0	SLC26A4	solute carrier family 26 member 4 (Pendrin)	Locus_21114	1.69377	3.23501	2.15242e-06	PF01740:STAS; PF00916:Sulfate_transp	GO:0016324:C:apical plasma membrane; GO:0016021:C:integral to membrane; GO:0008271:F:secondary active sulfate transmembrane transporter activity; GO:0006885:P:regulation of pH; GO:0032880:P:regulation of protein localization; GO:0008272:P:sulfate transport
H9GJ79	SLC26A9	solute carrier family 26 member 9	Locus_9932	3.56203	11.8108	1.88673e-24	PF01740:STAS; PF00916:Sulfate_transp	GO:0016021:C:integral to membrane; GO:0008271:F:secondary active sulfate transmembrane transporter activity; GO:0008272:P:sulfate transport
F7FN49	SLC4A10	solute carrier family 4 member 10	Locus_8876	1.85124	3.6081	0.000975675	PF07565:Band_3_cyto; PF00955:HCO3_cotransp	GO:0016021:C:integral to membrane; GO:0005452:F:inorganic anion exchanger activity
H0VTV0	SLC4A8	solute carrier family 4 member 8	Locus_10223	2.50583	5.67977	4.09991e-10	PF07565:Band_3_cyto; PF00955:HCO3_cotransp	GO:0016021:C:integral to membrane; GO:0005452:F:inorganic anion exchanger activity
F6QFZ9	slc7a5	solute carrier family 7 member 5	Locus_4928	1.27482	2.41969	0.00544783	NO PFAM	GO:0016021:C:integral to membrane; GO:0015171:F:amino acid transmembrane transporter activity
H0X1P6	SLC9A3	solute carrier family 9 member A3	Locus_5891	1.92982	3.81007	0.0118567	PF00999:Na_H_Exchanger	GO:0016021:C:integral to membrane; GO:0015385:F:sodium:hydrogen antiporter activity; GO:0006885:P:regulation of pH
H2ZY27	SLITRK6	SLIT and NTRK like family member 6	Locus_5476	1.15557	2.22772	0.0381452	PF13855:LRR_8	GO:0016021:C:integral component of membrane
F7DHS6	SMPD3	sphingomyelin phosphodiesterase 3	Locus_11938	2.74502	6.70398	2.97685e-13	PF03372:Exo_endo_phos	GO:0000137:C:Golgi cis cisterna; GO:0004767:F:sphingomyelin phosphodiesterase activity; GO:0030072:P:peptide hormone secretion; GO:0006684:P:sphingomyelin metabolic process
Q4V9B6	snap25	synaptosome associated protein 25	Locus_1864	2.76194	6.7831	1.25331e-07	PF00835:SNAP-25; PF05739:SNARE	GO:0043005:C:neuron projection
F5GWN7	SNAP91	synaptosome associated protein 91	Locus_4579	1.60539	3.04278	4.10281e-05	PF07651:ANTH	GO:0030118:C:clathrin coat; GO:0005545:F:1-phosphatidylinositol binding; GO:0048268:P:clathrin coat assembly
H3AI70	SOCS1	suppressor of cytokine signaling 1	Locus_21226	1.30824	2.47639	0.0493184	PF00017:SH2; PF07525:SOCS_box	GO:0035556:P:intracellular signal transduction; GO:0016567:P:protein ubiquitination
E7EXX7	sost	sclerostin	Locus_143988	1.51397	2.85596	0.00126998	PF05463:Sclerostin	GO:0005615:C:extracellular space
H3ARS1	SOSTDC1	sclerostin domain containing 1	Locus_33053	2.05547	4.15678	1.01399e-07	PF05463:Sclerostin	GO:0005615:C:extracellular space
Q4S0P5	SOX1	SRY-box 1	Locus_17697	3.10789	8.6212	8.36184e-15	PF00505:HMG_box; PF12336:SOXp	GO:0003700:F:sequence-specific DNA binding transcription factor activity; GO:0051091:P:positive regulation of sequence-specific DNA binding transcription factor activity
Q90XD1	sox10	SRY-box 10	Locus_1976	1.95196	3.86899	0.00685544	PF00505:HMG_box; PF12444:Sox_N	GO:0048484:P:enteric nervous system development; GO:0030318:P:melanocyte differentiation; GO:0050768:P:negative regulation of neurogenesis; GO:0001755:P:neural crest cell migration; GO:0048709:P:oligodendrocyte differentiation; GO:0071600:P:otic vesicle morphogenesis; GO:0048840:P:otolith development; GO:0010628:P:positive regulation of gene expression; GO:0014044:P:Schwann cell development; GO:0…
H3ACM9	SOX2	SRY-box 2	Locus_144495	1.73303	3.32425	6.58125e-06	PF00505:HMG_box; PF12336:SOXp	GO:0003677:F:DNA binding; GO:0006355:P:regulation of transcription, DNA-templated; GO:0005634:C:nucleus
Q6EJB7	sox3	SRY-box 3	Locus_36216	2.38427	5.22079	1.69821e-10	PF00505:HMG_box; PF12336:SOXp	GO:0005634:C:nucleus; GO:0003677:F:DNA binding; GO:0007417:P:central nervous system development; GO:0030182:P:neuron differentiation; GO:0043049:P:otic placode formation; GO:0007422:P:peripheral nervous system development; GO:0051091:P:positive regulation of sequence-specific DNA binding transcription factor activity; GO:0006351:P:transcription, DNA-dependent
H2V8X7	sp5	Sp5 transcription factor	Locus_15381	1.36877	2.5825	0.00138051	NO PFAM	GO:0003676:F:nucleic acid binding; GO:0008270:F:zinc ion binding
F6QTV2	SPACA9 (C9orf9)	sperm acrosome associated 9	Locus_38022	2.36598	5.15501	0.00448847	PF15120:DUF4561	GO:0001669:C:acrosomal vesicle; GO:0005881:C:cytoplasmic microtubule
H3BBT1	SPDEF	SAM pointed domain containing ETS transcription factor	Locus_45324	3.17124	9.00822	2.0179e-20	PF00178:Ets; PF02198:SAM_PNT	GO:0005634:C:nucleus; GO:0043565:F:sequence-specific DNA binding; GO:0003700:F:sequence-specific DNA binding transcription factor activity
H2TZT9	SPHK1	sphingosine kinase 1	Locus_62198	1.61082	3.05426	0.000608068	PF00781:DAGK_cat	GO:0004143:F:diacylglycerol kinase activity; GO:0007205:P:protein kinase C-activating G-protein coupled receptor signaling pathway
F1QL76	Srcin1	SRC kinase signaling inhibitor 1	Locus_72672	2.69327	6.46778	0.0182503	NO PFAM	GO:0030334:P:regulation of cell migration; GO:0061001:P:regulation of dendritic spine morphogenesis; GO:0034446:P:substrate adhesion-dependent cell spreading
H3A611	SSC4D	scavenger receptor cysteine rich family member with 4 domains	Locus_41909	3.71358	13.119	3.44169e-21	PF00530:SRCR	GO:0016020:C:membrane; GO:0005044:F:scavenger receptor activity
H3ABM6	SSTR5	somatostatin receptor 5	Locus_9518	1.26852	2.40914	0.0130269	PF00001:7tm_1	GO:0016021:C:integral to membrane; GO:0004994:F:somatostatin receptor activity; GO:0038170:P:somatostatin signaling pathway
H2LQH1	ST14	suppressor of tumorigenicity 14 protein homolog	Locus_23208	4.02833	16.3173	3.06197e-25	PF00431:CUB; PF00057:Ldl_recept_a; PF01390:SEA; PF00089:Trypsin	GO:0004252:F:serine-type endopeptidase activity; GO:0006508:P:proteolysis
H2LJ57	stk25	serine/threonine kinase 25	Locus_1397	1.7215	3.2978	1.08948e-06	PF00069:Pkinase	GO:0005524:F:ATP binding; GO:0004672:F:protein kinase activity
M3XKH7	STYXL1	serine/threonine/tyrosine interacting like 1	Locus_136805	2.07764	4.22116	0.00192361	PF00782:DSPc	GO:0008138:F:protein tyrosine/serine/threonine phosphatase activity; GO:0006470:P:protein dephosphorylation
I3KJ99	syp	synaptophysin	Locus_1332	2.62986	6.18965	1.86127e-10	PF01284:MARVEL	GO:0016021:C:integral to membrane; GO:0008021:C:synaptic vesicle; GO:0005215:F:transporter activity
Q8NB59	SYT14	synaptotagmin 14	Locus_8237	3.5879	12.0244	2.47643e-07	PF00168:C2	GO:0016021:C:integral to membrane; GO:0008219:P:cell death
H3AC20	TBX22	T-box 22	Locus_11036	1.34903	2.54741	0.0851154	PF00907:T-box	GO:0005634:C:nucleus; GO:0003677:F:DNA binding; GO:0003700:F:sequence-specific DNA binding transcription factor activity; GO:0006351:P:transcription, DNA-dependent
H3AXP5	TECPR1	tectonin beta-propeller repeat containing 1	Locus_14034	1.23226	2.34935	0.00500191	PF06462:Hyd_WA; PF06398:Pex24p	GO:0016021:C:integral to membrane; GO:0005543:F:phospholipid binding
G1N725	TEX2	testis expressed 2	Locus_41276	3.04238	8.23846	1.15539e-09	PF10296:DUF2404	GO:0016020:C:membrane
I3MI13	TFAP2D	transcription factor AP-2 delta	Locus_42733	2.57534	5.96012	0.0106727	PF03299:TF_AP-2	GO:0005634:C:nucleus; GO:0003700:F:sequence-specific DNA binding transcription factor activity
F7DPS8	tff1	trefoil factor 1	Locus_177960	3.02884	8.16155	0.000110278	PF00088:Trefoil	GO:0007586:P:digestion; GO:0042060:P:wound healing; GO:0005615:C:extracellular space
Q28874	TFPI	tissue factor pathway inhibitor	Locus_83802	3.35558	10.236	2.79514e-08	PF00014:Kunitz_BPTI	GO:0005615:C:extracellular space; GO:0004867:F:serine-type endopeptidase inhibitor activity
E9QIK3	timd4	T-cell immunoglobulin and mucin domain containing 4	Locus_60205	2.11192	4.32266	0.00821751	PF07686:V-set	GO:0016021:C:integral component of membrane
H3ABP3	TLX1	T-cell leukemia homeobox 1	Locus_46916	2.75897	6.76914	7.75395e-08	PF00046:Homeobox	GO:0005634:C:nucleus; GO:0043565:F:sequence-specific DNA binding; GO:0003700:F:sequence-specific DNA binding transcription factor activity
H2ZTX5	TLX2	T-cell leukemia homeobox 2	Locus_21495	1.43214	2.69846	0.0444223	PF00046:Homeobox	GO:0005634:C:nucleus; GO:0043565:F:sequence-specific DNA binding; GO:0003700:F:sequence-specific DNA binding transcription factor activity
F1QW55	tmc2	transmembrane channel like 2	Locus_34311	2.93694	7.65787	5.48273e-06	PF07810:TMC	GO:0016021:C:integral to membrane
F6ZZB4	tmcc2	transmembrane and coiled-coil domain family 2	Locus_122059	1.75125	3.3665	0.0456707	PF10267:Tmemb_cc2	GO:0016021:C:integral component of membrane
Q5F3L7	TMEM229B	transmembrane protein 229B	Locus_37430	2.87185	7.32004	3.92295e-07	PF06541:DUF1113	GO:0016021:C:integral to membrane
H3AMJ9	TMEM244	transmembrane protein 244	Locus_15289	1.29356	2.45132	0.0755062	PF09801:SYS1	GO:0016021:C:integral component of membrane
H3ALT0	TMEM269	transmembrane protein 269	Locus_2422	1.53344	2.89476	0.00191085	PF01066:CDP-OH_P_transf	GO:0016020:C:membrane; GO:0016780:F:phosphotransferase activity, for other substituted phosphate groups; GO:0008654:P:phospholipid biosynthetic process
F1QZJ9	tmem35	transmembrane protein 35	Locus_50597	3.22189	9.3301	7.86819e-15	PF13564:DoxX_2	GO:0016021:C:integral component of membrane
F6TG53	TMEM9	transmembrane protein 9	Locus_11770	2.19651	4.58369	2.45541e-09	PF05434:Tmemb_9	GO:0016021:C:integral to membrane
B0UXG9	tmprss3	transmembrane protease, serine 3	Locus_135702	6.04368	65.9673	2.23204e-06	PF00057:Ldl_recept_a; PF00530:SRCR; PF00089:Trypsin	GO:0016020:C:membrane; GO:0005044:F:scavenger receptor activity; GO:0004252:F:serine-type endopeptidase activity; GO:0006508:P:proteolysis
F6QEY7	TNN	tenascin N	Locus_231	2.33252	5.03685	8.47995e-05	PF00147:Fibrinogen_C; PF00041:fn3	GO:0007409:P:axonogenesis; GO:0016049:P:cell growth; GO:0007160:P:cell-matrix adhesion; GO:0016477:P:cell migration; GO:0009986:C:cell surface; GO:0005578:C:proteinaceous extracellular matrix
Q5PR62	tnni1	troponin I1, slow skeletal type	Locus_387	1.15142	2.22133	0.00384273	PF00992:Troponin	GO:0005861:C:troponin complex
H0VZE5	TNNT2	troponin T2, cardiac type	Locus_30317	2.1772	4.52275	4.12286e-08	PF00992:Troponin	GO:0005861:C:troponin complex
H3A7V3	TRIM29	tripartite motif containing 29	Locus_68561	4.69238	25.8552	1.88382e-36	PF00622:SPRY; PF00643:zf-B_box	GO:0005622:C:intracellular; GO:0008270:F:zinc ion binding
H2U217	trim36	tripartite motif containing 36	Locus_73846	2.51775	5.7269	6.96808e-12	PF00643:zf-B_box; PF13445:zf-RING_LisH	GO:0005622:C:intracellular; GO:0008270:F:zinc ion binding
H2M8W1	trpv5	transient receptor potential cation channel subfamily V member 5	Locus_104787	2.65096	6.28085	6.04657e-05	PF00023:Ank; PF12796:Ank_2; PF00520:Ion_trans	GO:0016021:C:integral to membrane; GO:0005262:F:calcium channel activity; GO:0070588:P:calcium ion transmembrane transport
H2SH16	TSPOAP1	TSPO associated protein 1	Locus_23402	1.53469	2.89725	0.00525129	PF07653:SH3_2	NO Gene Ontology
H0YTX3	TULP1	tubby like protein 1	Locus_13905	1.24929	2.37724	0.00137922	PF01167:Tub	GO:0005546:F:phosphatidylinositol-4,5-bisphosphate binding; GO:0016358:P:dendrite development; GO:0050908:P:detection of light stimulus involved in visual perception; GO:0042462:P:eye photoreceptor cell development; GO:0006910:P:phagocytosis, recognition; GO:0045494:P:photoreceptor cell maintenance; GO:0050766:P:positive regulation of phagocytosis; GO:1903546:P:protein localization to photorecept…
F1QRD9	ube2l3	ubiquitin conjugating enzyme E2 L3	Locus_60364	1.38626	2.61401	0.0170878	PF00179:UQ_con	GO:0016881:F:acid-amino acid ligase activity
A3KQL3	v2ra1	vomeronasal 2 receptor, a1	Locus_37200	1.55124	2.93069	0.0992578	PF00003:7tm_3; PF01094:ANF_receptor; PF07562:NCD3G	GO:0016021:C:integral to membrane; GO:0005886:C:plasma membrane; GO:0004930:F:G-protein coupled receptor activity
G1NNR3	VGLL3	vestigial like family member 3	Locus_46032	2.37304	5.18032	5.5759e-05	PF07545:Vg_Tdu	GO:0005634:C:nucleus; GO:0006355:P:regulation of transcription, DNA-dependent
I3K4J3	vldlr	very low density lipoprotein receptor	Locus_45566	1.13459	2.19557	0.0251152	PF07645:EGF_CA; PF00057:Ldl_recept_a; PF00058:Ldl_recept_b	GO:0016021:C:integral to membrane; GO:0005509:F:calcium ion binding
I3JVZ7	vwc2	von Willebrand factor C domain containing 2	Locus_36617	2.18405	4.54428	0.0132904	PF00093:VWC	GO:0007399:P:nervous system development
G3WFE5	VWF	von Willebrand factor	Locus_12983	2.33815	5.05653	6.41126e-10	PF08742:C8; PF01826:TIL; PF00092:VWA; PF00093:VWC; PF00094:VWD	GO:0005576:C:extracellular region
F1QE45	wbscr27	Williams Beuren syndrome chromosome region 27	Locus_27172	1.5907	3.01196	0.00145455	NO PFAM	GO:0008757:F:S-adenosylmethionine-dependent methyltransferase activity; GO:0032259:P:methylation; GO:0005737:C:cytoplasm
H3BGC3	WDR38	WD repeat domain 38	Locus_13231	1.73773	3.3351	0.020955	PF00400:WD40	NO Gene Ontology
F7CRK0	WDR72	WD repeat domain 72	Locus_37113	2.49932	5.65418	3.43112e-05	PF00400:WD40	NO Gene Ontology
G3PDS8	XKR7	XK related 7	Locus_54944	3.71912	13.1694	1.14495e-07	PF09815:XK-related	GO:0016021:C:integral component of membrane
Q1LVI2	yjefn3	YjeF N-terminal domain containing 3	Locus_8924	1.29295	2.45029	0.0137492	PF03853:YjeF_N	GO:0031580:P:membrane raft distribution; GO:0016525:P:negative regulation of angiogenesis; GO:0010874:P:regulation of cholesterol efflux; GO:0002040:P:sprouting angiogenesis; GO:0016020:C:membrane
A2VD29	zgc:158463	zgc:158463	Locus_145424	3.86689	14.5898	2.03353e-05	NO PFAM	NO Gene Ontology
F1RBB0	zgc:171927	uncharacterized	Locus_12089	3.65947	12.636	2.99618e-22	PF00071:Ras	GO:0005525:F:GTP binding; GO:0015031:P:protein transport; GO:0007264:P:small GTPase mediated signal transduction
Q566L4	znf703	zinc finger protein 703	Locus_2289	1.20834	2.31071	0.014926	PF12402:nlz1	GO:0005737:C:cytoplasm; GO:0000118:C:histone deacetylase complex; GO:0005634:C:nucleus; GO:0003676:F:nucleic acid binding; GO:0008270:F:zinc ion binding; GO:0034333:P:adherens junction assembly; GO:0048596:P:embryonic camera-type eye morphogenesis; GO:0030902:P:hindbrain development; GO:0034111:P:negative regulation of homotypic cell-cell adhesion; GO:0045892:P:negative regulation of transcriptio…
